1 Synergistic activity of IL-2 mutein with tolerogenic ImmTOR nanoparticles leads to massive expansion of  
2 antigen-specific Tregs and protection against autoimmune disease

3 Takashi Kei Kishimoto<sup>1,\*</sup>, Max Fournier<sup>1,#</sup>, Alicia Michaud<sup>1,#</sup>, Gina Rizzo<sup>1,#</sup>, Christopher Roy<sup>1,#</sup>, Teresa  
4 Capela<sup>1</sup>, Natasha Nukolova<sup>1</sup>, Ning Li<sup>1</sup>, Liam Doyle<sup>1</sup>, Fen-ni Fu<sup>1</sup>, Derek VanDyke<sup>2</sup>, Peter G. Traber<sup>1</sup>, Jamie B.  
5 Spangler<sup>2-8</sup>, Sheldon S. Leung<sup>1</sup>, and Petr O. Ilyinskii<sup>1</sup>

6 <sup>1</sup>Selecta Biosciences, Watertown, MA USA 02472

7 <sup>2</sup>Department of Chemical and Biomolecular Engineering, Johns Hopkins University, Baltimore, MD,  
8 21218, USA

9 <sup>3</sup>Department of Biomedical Engineering, Johns Hopkins University School of Medicine, Baltimore, MD,  
10 21205, USA

11 <sup>4</sup>Translational Tissue Engineering Center, Johns Hopkins University School of Medicine, Baltimore, MD,  
12 21231, USA

13 <sup>5</sup>Department of Oncology, Johns Hopkins University School of Medicine, Baltimore, MD 21205, USA

14 <sup>6</sup>Bloomberg~Kimmel Institute for Cancer Immunotherapy, Sidney Kimmel Comprehensive Cancer  
15 Center, Johns Hopkins University School of Medicine, Baltimore, MD, 21231, USA

16 <sup>7</sup>Department of Ophthalmology, Wilmer Eye Institute, Johns Hopkins University School of Medicine,  
17 Baltimore, MD 21231

18 <sup>8</sup>Department of Molecular Microbiology and Immunology, Johns Hopkins University Bloomberg School  
19 of Public Health, Baltimore, MD 21205, USA

20 \*To whom correspondence should be addressed

21 #M.F., A.M., G.R. and C.R. made equal contributions

22 **Abstract**

23 Low dose IL-2 therapy and IL-2 molecules engineered to be selective for the high affinity IL-2 receptor  
24 have been shown to expand Tregs in vivo, and, in the case of low dose IL-2 therapy, has demonstrated  
25 promising therapeutic benefit in autoimmune diseases. One of the potential limitations of IL-2 therapy  
26 is the nonselective expansion of pre-existing Treg populations rather than induction of antigen-specific  
27 Tregs, as well as potential activation of effector cells. We have recently developed biodegradable  
28 nanoparticles encapsulating rapamycin, called ImmTOR, to induce selective immune tolerance to co-  
29 administered antigens, such as immunogenic biologic drugs. Unlike Treg-selective IL-2 therapy, ImmTOR  
30 alone does not increase total Treg numbers. However, here we demonstrate that the combination of  
31 ImmTOR and an engineered Treg-selective IL-2 variant (termed IL-2 mutein) increases the number and  
32 durability of total Tregs, as well as inducing a profound synergistic increase in antigen-specific Treg when  
33 combined with a target antigen. We demonstrate that the combination of ImmTOR and an IL-2 mutein  
34 leads to durable inhibition of antibody responses to co-administered AAV gene therapy capsid, even at  
35 sub-optimal doses of ImmTOR, and provides protection in autoimmune models of type 1 diabetes and  
36 primary biliary cholangitis. ImmTOR also showed the potential to increase the therapeutic window of  
37 engineered IL-2 molecules by mitigating effector T cell expansion typically observed at higher doses of  
38 IL-2 and preventing exacerbation of disease in a model of graft-versus-host-disease. At the same time,  
39 engineered IL-2 molecules showed potential for dose-sparing of ImmTOR. Overall, these results establish  
40 that the combination of ImmTOR and an IL-2 mutein show synergistic benefit on both safety and efficacy  
41 to provide durable antigen-specific immune tolerance to mitigate drug immunogenicity and to treat  
42 autoimmune diseases.

43

## 44 Introduction

45 The autoimmune disease field is experiencing a resurgence in the development of regulatory T cell  
46 (Treg)-focused therapies to counterbalance autoreactive effector T cells in autoimmune disease<sup>1</sup>. Two  
47 divergent strategies that have emerged focus on either non-selectively expanding total Tregs or inducing  
48 antigen-specific Tregs<sup>2,3</sup>. Strategies to expand total Tregs frequently employ interleukin-2 (IL-2), a  
49 critical Treg growth and survival factor<sup>4,5</sup>. Tregs constitutively express a high affinity trimeric IL-2  
50 receptor, comprised of the  $\alpha$  (CD25),  $\beta$  (CD122) and  $\gamma$  (CD132) subunits (IL-2R $\alpha\beta\gamma$ ,  $K_D \sim 100$  pM); whereas,  
51 effector T cells and NK cells constitutively express an intermediate affinity heterodimeric IL-2 receptor,  
52 comprised of only the  $\beta$  (CD122) and  $\gamma$  (CD132) subunits (IL-2R $\beta\gamma$ ,  $K_D \sim 10$  nM). Low doses of IL-2 have  
53 been used clinically to selectively target the high affinity IL-2R $\alpha\beta\gamma$  on Tregs<sup>6-9</sup>, and the difference in the  
54 affinity of IL-2 for the two receptors has also been exploited by investigators to engineer IL-2 for the  
55 treatment of either autoimmune diseases or oncology<sup>10,11</sup>. Various engineered forms of IL-2, including  
56 IL-2 muteins<sup>12-16</sup>, pegylated IL-2<sup>17,18</sup>, IL-2-antibody complexes and fusion proteins<sup>19-23</sup>, and CD25-IL-2  
57 fusion proteins<sup>24</sup>, have been designed to selectively engage the high affinity IL-2 receptor, leading to  
58 biased expansion of Tregs in vivo. Large numbers of expanded and activated Tregs can provide  
59 'bystander suppression' to inhibit immune responses in an antigen-independent manner, through the  
60 production of immunosuppressive cytokines, sequestration of IL-2 from effector T cells, generation of  
61 extracellular adenosine, and/or through Treg-mediated trogocytosis of co-stimulatory molecules  
62 expressed by antigen-presenting cells<sup>25-27</sup>. Early phase clinical trials of low dose IL-2 have demonstrated  
63 promising results in treatment of systemic lupus erythematosus (SLE), graft-versus-host disease (GVHD),  
64 and other autoimmune conditions<sup>6-8,28</sup>.

65 Despite early successes with low dose IL-2 therapies, antigen-specific immune tolerance has been a  
66 long-standing goal for immunotherapy of autoimmune diseases, which are currently treated by systemic  
67 immunosuppressive or immunomodulatory drugs. Indeed, preclinical studies suggest that antigen-  
68 specific Tregs play a dominant role in preventing autoimmunity<sup>29</sup> and are more effective than total Tregs  
69 in mitigating autoimmune disease<sup>30</sup>. The ratio of Treg:effector T cells is thought to be an important  
70 factor in immune homeostasis<sup>31,32</sup>. Thus, the generation of large numbers of antigen-specific Tregs may  
71 be necessary to offset the large pool of pre-existing autoreactive effector T cells in the context of  
72 autoimmune disease. Autologous T cells can be engineered ex vivo to express specific T cell receptors  
73 (TCRs) in order to generate large numbers of antigen-specific Tregs; however, this strategy has the  
74 drawback of complex and costly manufacturing of personalized cell therapies. An alternative strategy is  
75 the in vivo induction of antigen-specific Tregs. Early clinical trials of antigen-specific immune tolerance  
76 strategies have shown encouraging results<sup>33-35</sup>.

77 We have developed biodegradable tolerogenic nanoparticles, termed ImmTOR, which encapsulate  
78 rapamycin, a macrolide inhibitor of the mTOR pathway<sup>36,37</sup>. ImmTOR nanoparticles selectively  
79 biodistribute to the spleen and liver following intravenous injection, and they induce a tolerogenic  
80 phenotype in antigen-presenting cells that endocytose the nanoparticles<sup>37-39</sup>. ImmTOR has been shown  
81 to induce immune tolerance to a variety of co-administered antigens, as demonstrated by: 1) induction  
82 of antigen-specific Tregs; 2) the ability to transfer tolerance from treated mice to naïve recipients; 3) the  
83 ability to withstand subsequent challenge with the antigen alone; and 4) the ability to maintain  
84 immunological responses to unrelated antigens<sup>36</sup>. Therapeutic administration of ImmTOR + antigen has  
85 been shown to inhibit disease relapse in a relapsing-remitting model of experimental autoimmune  
86 encephalomyelitis (EAE)<sup>38,40</sup>. In addition, ImmTOR enables repeated dosing of highly immunogenic

87 microbial therapeutic proteins, such as a fungal-derived uricase enzyme (pegadricase), a bacterial-  
88 derived immunotoxin, and viral-derived gene therapy vectors<sup>33, 37, 41</sup>. ImmTOR dosed in combination with  
89 pegadricase has been shown to inhibit the formation of anti-drug antibodies in humans<sup>33</sup> and is being  
90 evaluated in Phase 3 clinical trials for the treatment of chronic refractory gout (NCT04513366 and  
91 NCT04596540).

92 Here we describe an in vivo strategy to leverage the benefits of polyclonal Treg expansion as well as  
93 induction and expansion of antigen-specific Tregs using a combination of a Treg-selective IL-2 mutein  
94 and ImmTOR co-administered with a target antigen. This combination therapy approach produces a  
95 massive and synergistic increase in antigen-specific Tregs in vivo. When administered in combination  
96 with an adeno-associated virus (AAV) gene therapy vector, treatment with ImmTOR and an IL-2 mutein  
97 led to profound synergistic inhibition of anti-AAV antibodies, even at sub-therapeutic doses of ImmTOR.  
98 Similarly, combining ImmTOR + IL-2 mutein treatment with a nanoparticle-encapsulated autoantigen  
99 protected non-obese diabetic (NOD) mice from the development of Type 1 diabetes (T1D) and was  
100 efficacious in a mouse model of primary biliary cholangitis (PBC). In addition, ImmTOR + IL-2 mutein  
101 treatment increased the therapeutic window of engineered IL-2 by restraining effector cell activation  
102 and preventing disease exacerbation in a model of GVHD. Taken together, these results suggest that the  
103 combination of ImmTOR with a Treg-selective IL-2 molecule could be a modular and effective strategy to  
104 promote specific immune tolerance to a variety of target antigens.

105

## 106 **Results**

### 107 **Combination of Treg-selective IL-2 + ImmTOR leads to biased Treg expansion**

108 To investigate the effects of combining ImmTOR and a Treg-selective IL-2 on nonselective expansion of  
109 total Tregs, we employed a mouse IL-2 mutein fused to an Fc domain for extended in vivo half-life, as  
110 described by Gavin and colleagues (known as Fc.IL2m)<sup>15, 42</sup>. Mice treated with a single dose of Fc.IL2m  
111 alone showed a dramatic increase in total splenic Tregs, with a peak at 4 days and levels declining back  
112 to baseline by day 14 (Figure 1A, Suppl Fig 1), as previously described<sup>13</sup>. As expected, mice treated with  
113 ImmTOR alone showed little or no increase in total Tregs (Figure 1A, B) compared to naïve mice.  
114 However, the addition of ImmTOR amplified Treg expansion in response to Fc.IL2m. The Treg response  
115 to ImmTOR+Fc.IL2m lagged behind that observed with Fc.IL2m alone, with levels peaking approximately  
116 7 days after treatment (Figure 1A, B). Moreover, Treg levels remained significantly increased at 14 days  
117 after treatment with ImmTOR+Fc.IL2m compared to both naïve mice and mice treated with Fc.IL2m  
118 alone. The absolute number of Tregs and the percent Tregs of total CD4<sup>+</sup> T cells showed dose-  
119 dependent increases (up to 13-fold) following treatment with ImmTOR+Fc.IL2m compared to naïve mice  
120 (Figure 1C), and striking increases were observed in the number and percentage of Ki67<sup>+</sup> proliferating  
121 Tregs and Helios<sup>+</sup> stable Tregs (Figure 1C, Suppl Figure 2A). Whole animal imaging of mice expressing  
122 red fluorescence protein (RFP) under control of the Foxp3 promoter provided in situ confirmation of  
123 increased Foxp3 expression when ImmTOR was co-administered with Fc.IL2m (Figure 1D). Notably,  
124 treatment with the Treg-selective Fc.IL2m led to increases in CD8<sup>+</sup> cytolytic T cells (CTL), effector CD4<sup>+</sup> T  
125 cells (Teff), and natural killer (NK) cells at high doses of 18 and 27 µg (Figure 1E). In contrast, the  
126 addition of ImmTOR to Fc.IL2m suppressed the expansion of these immune effector cell subsets. The  
127 increased numbers of Tregs combined with suppression of effector cells resulted in substantially  
128 increased Treg:effector cell ratios in animals treated with ImmTOR + Fc.IL2m compared to mice treated

129 with Fc.IL2m alone or naïve mice (Figure 1F). Similar effects of ImmTOR+Fc.IL2m treatment were  
130 observed in the liver, although the degree of Treg expansion was lower than that observed in the spleen  
131 (Suppl Figure 2B).

132 We observed that circulating Fc.IL2m showed slower clearance in animals treated with ImmTOR+Fc.IL2m  
133 versus those treated with Fc.IL2m alone (Suppl Figure 3A). The clearance of Fc.IL2m correlated with the  
134 kinetics of IL-2R $\alpha$  (CD25) expression, which was delayed in the ImmTOR+Fc.IL2m treated group (Suppl  
135 Figure 3B), consistent with the delayed peak of Foxp3<sup>+</sup> Treg (Figure 1A). Circulating levels of Fc.IL2m  
136 were ~10-fold higher at Day 4 in animals treated with ImmTOR+Fc.IL2m compared to those that  
137 received only Fc.IL2m. Treatment with ImmTOR+Fc.IL2m led to greater demethylation of the Foxp3 and  
138 EOS genes compared to treatment with Fc.IL2m alone, although the demethylation pattern of the Helios  
139 gene was similar in animals treated with ImmTOR+Fc.IL2m and those that received Fc.IL2m only (Suppl  
140 Figure 3C). ImmTOR alone showed no significant effects on methylation patterns.

141 As Fc.IL2m is a mouse IL-2-derived mutein, we sought to evaluate the synergy of ImmTOR with a human  
142 IL-2-derived molecule. To this end, we made use of an engineered Treg-selective human IL-2  
143 immunocytokine, denoted F5111 IC, which is comprised of the human anti-IL-2 antibody F5111<sup>20</sup>  
144 covalently tethered to human IL-2<sup>22</sup>. F5111 IC has been shown to potently and selectively stimulate the  
145 high affinity IL-2R resulting in robust in vitro activation and in vivo expansion of Tregs<sup>22</sup>. We evaluated  
146 the activity of F5111 IC and ImmTOR in immunodeficient NOD SCID gamma mice 2-3 weeks after  
147 engraftment with human peripheral blood mononuclear cells (HuPBMC). The HuPBMC mice, which are  
148 prone to develop GVHD, showed marked expansion of Treg, CD8<sup>+</sup> T cells, and NK cells after F5111 IC  
149 treatment (Figure 2A). Although the mice did not show signs of GVHD at the time of treatment, the  
150 expansion of effector cells may reflect sub-clinical inflammation of HuPBMC in response to host mouse  
151 antigens. Importantly, the addition of ImmTOR to F5111 IC treatment enabled expansion of Treg but  
152 inhibited the expansion of CD8<sup>+</sup> T cells and NK cells (Figure 2A). We next evaluated the effects of F5111  
153 IC and ImmTOR in a model of GVHD in which host mice were irradiated prior to transfer of HuPBMC,  
154 which accelerates disease course. F5111 IC alone exacerbated disease, leading to increased mortality,  
155 while the combination of ImmTOR + F5111 IC prolonged survival and improved disease scores (Figure 2B  
156 and Suppl Figure 4). Treatment with ImmTOR alone was similarly efficacious, but the combination with  
157 F5111 IC showed a trend to better durability of response.

158 We next assessed the effects of F5111 IC in a non-disease setting using engineered knock-in mice  
159 expressing human IL-2R $\alpha\beta$ , which can form functional IL-2 receptors with endogenously expressed  
160 mouse IL-2R $\gamma$ . F5111 IC induced robust Treg expansion in the engineered human IL-2R $\alpha\beta$  mice without  
161 substantial expansion of CD8<sup>+</sup> T cells (Figure 2C). The addition of ImmTOR to F5111 IC resulted in a  
162 corresponding synergistic expansion of Tregs, similar to that observed in wild-type mice treated with  
163 ImmTOR+Fc.IL2m. Collectively, the results of our mouse and human Treg expansion studies demonstrate  
164 that combination treatment with ImmTOR and Treg-selective IL-2 molecules induces selective  
165 promotion of Treg proliferation, synergistically enhancing the activity of the Treg-selective IL-2  
166 molecules alone while restraining effector cell activation.

### 167 **ImmTOR+Fc.IL2m treatment ameliorates autoimmune hepatitis**

168 The activity of the ImmTOR+Fc.IL2m was evaluated in a model of autoimmune hepatitis induced by  
169 systemic administration of the concanavalin A, a lectin that causes polyclonal lymphocyte activation and

170 hepatic infiltration of activated immune cells. Previous studies have shown that Treg depletion with  
171 anti-IL-2R $\alpha$  antibodies exacerbated disease while adoptive transfer of Treg ameliorated disease<sup>43</sup>. Both  
172 ImmTOR and Fc.IL2m monotherapies inhibited infiltration of activated effector T cells, and the  
173 combination treatment led to a further reduction in T cell infiltrates (Figure 3A). Similar, though more  
174 modest, reductions were observed in activated NK cells; whereas reductions in activated NKT cells,  
175 neutrophils, and macrophages were primarily mediated by ImmTOR (Suppl Figure 5). Both ImmTOR  
176 and Fc.IL2m reduced production of serum interferon- $\gamma$  (IFN- $\gamma$ ) and, to a lesser extent, of CXCL1  
177 chemokine (Figure 3B). Combination treatment further reduced the levels of both IFN- $\gamma$  and CXCL1,  
178 whereas reductions in IL-6 were primarily mediated by ImmTOR. ImmTOR+Fc.IL2m administration also  
179 induced increased production of FGF21, a hepatoprotective stress-response growth factor (Figure 3C).  
180 Overall, this model illustrates the therapeutic potential for ImmTOR+Fc.IL2m combination therapy in  
181 autoimmune hepatitis.

### 182 **ImmTOR+Fc.IL2m leads to synergistic induction and expansion of antigen-specific Treg**

183 ImmTOR has been shown to induce antigen-specific Treg to co-administered antigens<sup>36,37</sup>. We therefore  
184 sought to test whether ImmTOR+Fc.IL2m could enhance the induction of antigen-specific Treg when co-  
185 administered with antigen. In these experiments, we utilized ovalbumin (OVA) as the target antigen  
186 following adoptive transfer of OVA-specific OT-II CD4<sup>+</sup> T cells. As expected, ImmTOR+OVA did not  
187 expand pre-existing host Treg but induced OT-II Foxp3<sup>+</sup> Treg (Figure 4A). In contrast, Fc.IL2m+OVA  
188 expanded host Tregs but did not have a significant effect on OT-II Tregs. The triple combination of  
189 ImmTOR+Fc.IL2m+OVA led to a profound synergistic expansion of OVA-specific OT-II Tregs, while also  
190 increasing total host Treg compared to Fc.IL2m+OVA or ImmTOR+OVA treatment alone.  
191 ImmTOR+Fc.IL2m without OVA had only a modest effect on OT-II Tregs, consistent with previous  
192 findings that the target antigen must be co-administered with ImmTOR to induce antigen-specific  
193 Tregs<sup>37</sup>. Increasing amounts of OVA led to a dose-dependent increase in OT-II Treg in response to  
194 ImmTOR+Fc.IL2m, plateauing at approximately 100  $\mu$ g OVA (Figure 4B). As anticipated, there was no  
195 significant effect of increasing amounts of OVA on the host Treg response.

196 Free OVA is expected to biodistribute widely, whereas ImmTOR has been shown to biodistribute  
197 selectively to the spleen and liver<sup>37-39</sup>. Thus, only a small proportion of the total free OVA dose is  
198 expected to co-localize with the splenic and hepatic antigen-presenting cells that endocytose ImmTOR.  
199 We therefore examined whether formulating ovalbumin in nanoparticles would improve the efficiency  
200 of OT-II Treg expansion by increasing co-localization with ImmTOR. Nanoparticles encapsulating 0.05  $\mu$ g  
201 OVA (NP-OVA) enabled significantly more OT-II Treg induction and expansion in response to  
202 ImmTOR+Fc.IL2m treatment than did free OVA at 100-fold higher doses (Figure 4C). Maximal Treg  
203 expansion was observed at 0.5  $\mu$ g nanoencapsulated OVA, with further increase of NP-OVA providing no  
204 additional Treg elevation. Taken together, these OT-II mouse studies established that ImmTOR+Fc.IL2m  
205 treatment leads to robust antigen-specific Treg expansion when co-administered with the target  
206 antigen, particularly with nanoencapsulated antigen.

### 207 **ImmTOR+Fc.IL2m treatment synergistically inhibits anti-AAV antibody responses**

208 Combination ImmTOR+Fc.IL2m treatment was assessed for the ability to inhibit antibody responses to  
209 an adeno-associated virus (AAV) gene therapy vector. Mice immunized with two doses of AAV8 on Day  
210 0 and Day 56 developed rapid and robust anti-AAV immunoglobulin G (IgG) antibody responses (Figure

211 5). As previously reported<sup>44, 45</sup>, ImmTOR was shown to inhibit anti-AAV antibody responses when co-  
212 administered with AAV vectors at a dose of 200 µg; however, some animals exhibited late breakthrough  
213 of anti-AAV antibodies at Day 91 (Figure 5). Suboptimal doses of 50 or 100 µg ImmTOR resulted in  
214 earlier breakthrough of antibody responses. Similarly, Fc.IL2m co-administered with AAV on Days 0 and  
215 56 showed weak modulation of AAV immunogenicity, with antibodies detected as early as 12 days after  
216 immunization. In contrast, ImmTOR+Fc.IL2m combination treatment resulted in complete inhibition of  
217 anti-AAV antibodies, even at sub-optimal doses of ImmTOR. Anti-AAV IgG levels were significantly lower  
218 in animals treated with ImmTOR+Fc.IL2m compared to those treated with ImmTOR alone from day 33  
219 onwards (Suppl Table ST1). These results indicate that combining ImmTOR with Fc.IL2m provides  
220 synergistic benefit for the efficacy and durability of AAV immunogenicity mitigation.

221 Similar synergistic effects of ImmTOR+Fc.IL2m were observed using a high vector dose of 5E13 vg/kg  
222 AAV8, showing control of anti-AAV IgG development for more than 4 months after AAV inoculation  
223 (Suppl Fig 6A). Immune phenotyping of splenocytes also reflected the synergistic effect of ImmTOR and  
224 Fc.IL2m. There were trends towards increased numbers of total splenic CD8<sup>+</sup> T cells, CD4<sup>+</sup> effector T  
225 cells, and B cell plasmablasts four days after administration of a high vector dose of AAV alone (Suppl Fig  
226 6B). Robust expansion of total Tregs was observed at Day 4 when Fc.IL2m was co-administered with  
227 AAV; however, this was also accompanied by substantial expansion of CD8<sup>+</sup> T cells and plasmablasts.  
228 The combination of ImmTOR with Fc.IL2m co-administered with high dose AAV induced robust  
229 expansion of total Tregs at Days 4 and 7 while inhibiting effector T cell expansion, resulting in  
230 significantly elevated Treg:CTL ratios (Suppl Fig 6B, Suppl. Table ST2).

### 231 **Efficacy of ImmTOR+Fc.IL2m in autoimmune disease is enhanced by co-administration of** 232 **nanoencapsulated antigen**

233 We next evaluated the ability of ImmTOR + Fc.IL2m to prevent type 1 diabetes in the NOD mouse model.  
234 NOD mice were administered 4 monthly treatments starting at 8 weeks of age (Figure 6A). ImmTOR and  
235 ImmTOR+Fc.IL2m were administered in the absence or presence of nanoparticle-entrapped hybrid  
236 diabetes peptide 6.9<sup>46</sup> (NP-HIP6.9). Whereas 7 out of 10 mice in the control group progressed to  
237 diabetes by week 30, all treated groups showed evidence of disease protection (Figure 6A and 6B). The  
238 cohort treated with ImmTOR+Fc.IL2m combined with NP-HIP6.9 was the only group that did not have a  
239 single diabetic mouse by week 33. Notably, even in the absence of co-delivered antigen, the  
240 ImmTOR+Fc.IL2m combination protected 9 out of 10 mice from diabetes at week 33.

241 We also assessed the activity of ImmTOR and Fc.IL2m in NOD.C3C4 mice, which spontaneously develop  
242 an autoimmune disease of the liver which closely resembles primary biliary cholangitis (PBC)<sup>47, 48</sup>. The  
243 primary T cell epitope has been mapped to a peptide in the inner lipoyl domain of the E2 component of  
244 the pyruvate dehydrogenase complexes (PDC-E2-ILD)<sup>47</sup>. Mice were treated with three monthly doses of  
245 ImmTOR, ImmTOR+Fc.IL2m or ImmTOR+Fc.IL2m combined with nanoencapsulated PDC-E2-ILD antigen  
246 (NP-PDC-E2-ILD) (Figure 7A). Treatment with ImmTOR+Fc.IL2m significantly reduced bile duct epithelial  
247 degeneration, biliary hyperplasia and liver inflammation (Figure 7B). Co-administration of NP-PDC-E2-  
248 ILD provided additional benefit. Liver histology showed striking biliary pathology, with marked peri-  
249 biliary mononuclear cell infiltrates, biliary hypercellularity and ductular ectasia in both female (Figure  
250 7C-F) and male mice (Figure 7 G-J). Treatment with ImmTOR (Figure 7D and 7H), ImmTOR+Fc.IL2m  
251 (Figure 7E and 7I), and ImmTOR+Fc.IL2m+NP-PDC-E2-ILD (Figure 7F and 7J), showed progressive  
252 improvement of all histologic features, with the triple therapy showing only minimal residual disease

253 pathology. Collectively, these AAV immunogenicity and T1D and PBC autoimmune disease models  
254 highlight the therapeutic promise of combining ImmTOR with a Treg-selective IL-2 molecule, particularly  
255 in the context of antigen co-administration.

256

## 257 **Discussion**

258 We describe here profound synergistic activity between ImmTOR nanoparticles carrying rapamycin and  
259 engineered IL-2 molecules that selectively activate Tregs to expand the number and durability of total  
260 Treg population, as well as in inducing and expanding antigen-specific Tregs in the presence of a co-  
261 administered target antigen. This combination therapy leverages the large body of preclinical and  
262 clinical work showing that Treg-directed IL-2 therapy can be used to selectively expand pre-existing  
263 Tregs in vivo, particularly memory and activated Tregs, for the treatment of a wide range of  
264 autoimmune diseases,<sup>4, 5, 49</sup> while adding the ability to induce autoantigen-specific Tregs, which have  
265 been shown to be more effective than Tregs that are not disease-specific in animal models of  
266 autoimmune disorders<sup>30</sup>. While expansion of total Tregs has shown benefit in the treatment of  
267 autoimmune diseases in animals and in humans<sup>6-9</sup>, the ability to induce Tregs of novel antigen specificity  
268 may have additional benefits in autoimmune diseases driven by antigens for which natural thymic-  
269 derived Tregs are unlikely to exist. These include neoantigens created by post-translational modification  
270 of self-antigens, such as hybrid antigens in the case of type 1 diabetes and citrullinated antigens in the  
271 case of rheumatoid arthritis, as well as diseases driven by environmental antigens, such as  
272 transglutaminase-modified gluten proteins in the case of celiac disease<sup>32, 46, 50-54</sup>. In addition, our  
273 technology offers the possibility of inducing of antigen-specific immune tolerance to foreign therapeutic  
274 proteins, such as microbial enzymes or viral gene therapy vectors, which would be desirable to mitigate  
275 immunogenicity that can compromise the safety and/or efficacy of these treatments<sup>55-57</sup>.

276 Tregs are highly responsive to in vivo therapy with low dose IL-2 or engineered Treg-selective IL-2.  
277 Curiously, purified Treg do not proliferate in response to IL-2 in vitro<sup>58</sup>, suggesting that other signals,  
278 such as endogenous antigens presented by antigen-presenting cells and/or co-stimulation, may be  
279 required for Tregs to respond to IL-2. Although Tregs are primed to respond to IL-2 in vivo, they do not  
280 respond to in vivo treatment with rapamycin-loaded nanoparticles (ImmTOR) alone (Figure 4A).  
281 Rapamycin has been used to expand Tregs ex vivo, but the culture conditions require either the addition  
282 of exogenous IL-2 or polyclonal activation of total T cells, which are a potential source of IL-2<sup>59, 60</sup>. We  
283 have demonstrated that in vivo administration of ImmTOR with a target antigen promotes induction of  
284 antigen-specific Treg but does not impact total Treg abundance<sup>37, 38, 40</sup> (Figure 4A). The number of  
285 antigen-specific Tregs induced by ImmTOR is limited, perhaps because production of endogenous IL-2 is  
286 limited to antigen-specific effector cells responding to the same antigen. We hypothesized that the  
287 number and durability of antigen-specific Tregs could be further enhanced by the addition of exogenous  
288 Treg-selective IL-2. Our in vivo results are consistent with in vitro studies showing that the addition of  
289 rapamycin increased Treg abundance in T cells treated with IL-2 or activated with anti-CD3 and anti-  
290 CD28 antibodies<sup>59</sup>. Mechanistic studies indicate that the addition of rapamycin to IL-2 stimulated T cells  
291 is due to increased frequency of Foxp3 expression rather than selective proliferation of Foxp3<sup>+</sup> cells<sup>59</sup>.

292 Interestingly, a single administration of Fc.IL2m with ovalbumin showed little or no specific expansion of  
293 adoptively transferred OVA-specific T cells (Figure 4A). Recently, Gavin and colleagues demonstrated  
294 that multiple cycles of treatment with an Fc.IL2m combined with OVA in the form of a dendritic cell-



295 targeted anti-DEC205-OVA fusion protein were required to induce and expand OVA-specific OT-II  
296 Tregs<sup>42</sup>. Each cycle of treatment consisted of initially expanding total Tregs, including adoptively  
297 transferred OT-II cells, using an IL-2 mutein alone, followed 2-4 days later with anti-DEC205-OVA. The  
298 rationale for this approach was to provide a selective survival strategy for the OT-II Tregs by activating  
299 them with antigen at the peak of total Treg expansion. A single cycle of IL-2 mutein followed by  
300 DEC205-OVA treatment showed no significant increase in OT-II Tregs 6 days after initiation of treatment;  
301 however, three weekly cycles of treatment increased OT-II Tregs from a baseline of ~3% to 18%. These  
302 results are consistent with our results showing that the same engineered IL-2 mutein showed little or no  
303 expansion of antigen-specific OT-II T cells after a single dose. In contrast, a single treatment of ImmTOR  
304 + IL-2 mutein + OVA increased OT-II Tregs from a baseline of ~3% to ~45% by 7 days after treatment  
305 (Figure 4A). Daniel et al. showed that everolimus, a second generation rapalogue could also expand  
306 adoptively transferred antigen-specific Tregs when combined with the high affinity IL-2R-biased anti-IL-2  
307 antibody JES6-1 complexed with IL-2 + antigen<sup>61</sup>. In this study, daily dosing of everolimus at 100µg/day  
308 for 14 days, a regimen that is typically used to mediate chronic immune suppression to prevent graft  
309 rejection, was required for Treg expansion. In contrast, our results show that a single dose of 100 µg  
310 ImmTOR was sufficient to induce antigen-specific Treg expansion when combined with an IL-2 mutein.  
311 Our results therefore suggest that combination treatment with ImmTOR and Treg-biased IL-2 molecules  
312 may allow for more efficient expansion of antigen-specific Treg compared to previous strategies.

313 Combination therapies are warranted for complex and serious diseases, but these approaches are often  
314 limited by additive or synergistic toxicity. ImmTOR co-administration with Treg-selective IL-2 may  
315 represent a rare exception in which combination therapy is less toxic than the individual components.  
316 The dose limiting toxicity of ImmTOR in human clinical trials has been stomatitis, a common rapamycin-  
317 associated side-effect<sup>33</sup>. Evaluation of the combination of ImmTOR with an IL-2 mutein showed  
318 synergistic activity in preventing antibody responses to an AAV gene therapy vector, even at  
319 subtherapeutic doses of ImmTOR (Figure 5), suggesting that the addition of an IL-2 mutein could allow  
320 for dose-sparing of ImmTOR. Conversely, the primary concern of IL-2-based therapies is the activation  
321 and expansion of effector cells, including CD4<sup>+</sup> and CD8<sup>+</sup> effector T cells, as well as NK cells<sup>62</sup>.  
322 Rapamycin, the active component of ImmTOR, is known to inhibit effector cell proliferation, while being  
323 permissive for Treg proliferation, and we observed that the addition of ImmTOR to high-dose IL-2  
324 mutein therapy mitigated the expansion of effector cells in healthy mice (Figure 1E). Similarly, the  
325 combination of ImmTOR with an IL-2 mutein mitigated effector cell expansion following administration  
326 of high vector doses of AAV, which can cause hepatic inflammation<sup>57</sup> (Suppl Figure 6B). One potential  
327 concern for Treg-selective IL-2 therapies is that in settings of inflammatory disease, activated effector T  
328 cells can transiently express IL-2R $\alpha$ , leading to the formation of the high affinity IL-2R $\alpha\beta\gamma$ <sup>10,11</sup>. Indeed,  
329 following adoptive transfer of human PBMC into immunodeficient mice, a setting which can lead to  
330 GVHD, administration of the Treg-selective IL-2 fusion protein F5111 IC alone led to exaggerated  
331 expansion of effector T cells (Figure 2A). However, this expansion was prevented by the addition of  
332 ImmTOR. The increased expansion of effector cells observed in HuPBMC mice treated with F5111 IC  
333 alone correlated with exacerbation of disease in a HuPBMC GVHD model. Notably the addition of  
334 ImmTOR to F5111 IC significantly increased survival in this model (Figure 2B). Disease exacerbation has  
335 also been reported for the IL-2/JES6-1 anti-IL-2 antibody complex in a mouse model of inflammatory  
336 arthritis induced by infection with chikungunya virus<sup>63</sup>. Administration of IL-2/JES6-1 during active  
337 infection increased both Tregs and effector T cells resulting in disease worsening, while prophylactic  
338 administration in healthy mice prevented subsequent disease. Thus the activity of engineered IL-2

339 molecules may be dose-limited due to its effects on effector cells in settings of inflammation. The  
340 addition of ImmTOR increases the therapeutic window of Treg-selective IL-2 by restraining effector cell  
341 activation while synergistically increasing Tregs. Another potential concern related to engineered IL-2  
342 molecules is their potential for immunogenicity. ImmTOR has been shown to inhibit immunogenicity of a  
343 variety of co-administered biologic therapies and could thus counteract potential anti-drug antibody  
344 responses<sup>37</sup>. Caution is warranted, as the combination of rapamycin with low dose IL-2 was reported to  
345 induce transient impairment of  $\beta$  cell function in a small clinical trial conducted in patients with Type 1  
346 diabetes<sup>64</sup>. The authors speculated that the toxicity was related to IL-2, as  $\beta$  cell impairment was  
347 observed in patients that did not receive the full course of rapamycin and was most significant in the  
348 first month of therapy, concordant with IL-2 treatment. Our use of an engineered Treg-selective IL-2  
349 molecules with long circulating half-life combined with ImmTOR could help mitigate potential toxicities  
350 associated with low dose cytokine administration.

351 The combination of ImmTOR with engineered Treg-selective IL-2 molecules showed potent synergistic  
352 activity in inhibiting antibody responses against an AAV gene therapy vector (Figure 5, Suppl Figure S5A).  
353 Currently, AAV gene therapies are limited to a single systemic administration due to development of  
354 high neutralizing antibody titers<sup>57</sup>. Even low titers of neutralizing antibodies may block transduction;  
355 thus, potent and durable inhibition of anti-capsid antibodies would be required to enable vector re-  
356 administration. ImmTOR+Fc.IL2m combination therapy also showed potent activity in preventing type 1  
357 diabetes in NOD mice (Figure 6). In this model, ImmTOR+Fc.IL2m combined with a nanoencapsulated  
358 chromogranin A-insulin hybrid peptide provided the longest disease-free duration of activity, although  
359 ImmTOR and ImmTOR+Fc.IL2m administered in the absence of exogenous antigen also provided strong  
360 protection. Similarly, ImmTOR+Fc.IL2m showed significant activity in a mouse model of PBC, with  
361 marked reduction of peri-biliary mononuclear cell infiltrates, biliary hypercellularity and ductular ectasia  
362 (Figure 7). The addition of nanoencapsulated PDC-E2-ILD antigen further improved activity of  
363 ImmTOR+Fc.IL2m. Taken together, these results reinforce the importance of driving antigen-specific  
364 tolerogenic responses provided by co-administration of nanoencapsulated antigens. However, the  
365 efficacy of ImmTOR+Treg-selective IL-2 alone in models of both T1D and PBC suggests the possibility  
366 that this combination may be able to induce tolerogenic immune responses to endogenously expressed  
367 autoantigens in the context of autoimmune disease. In summary, our work demonstrates that  
368 combining ImmTOR with engineered Treg-selective IL-2 molecules provides a promising approach to  
369 mitigate pathogenic autoimmunity by leveraging both bystander suppression through expansion of total  
370 Tregs as well as inducing and expanding antigen-specific Tregs.

371

## 372 **Materials and Methods**

### 373 **ImmTOR, other nanoparticles and IL-2 mutein molecules**

374 Rapamycin containing nanoparticles (ImmTOR) were manufactured as described earlier<sup>34,35</sup>. ImmTOR  
375 doses were based on rapamycin content ranging from 50 to 300  $\mu$ g per mouse. Rapamycin (sirolimus)  
376 was manufactured by Concord Biotech (Ahmedabad, India). Antigen-containing nanoparticles (NP) were  
377 prepared using a water/oil/water (W/O/W) double-emulsion solvent evaporation method as  
378 described<sup>35</sup>. Briefly, PLGA (50:50) and pegylated polylactic acid (PLA-PEG) were dissolved in  
379 dichloromethane to form the oil phase. An aqueous solution of antigen (chicken ovalbumin or OVA  
380 protein, hybrid insulin peptide HIP6.9 (LQTLALNAARDP), or PDC-E2-ILD (amino acids 213-314)<sup>65</sup> was then

381 added to the oil phase and emulsified by sonication (Branson Digital Sonifier 250A). Following  
382 emulsification of the antigen solution into the oil phase, a double emulsion was created by adding an  
383 aqueous solution of polyvinyl alcohol and sonicating a second time. The double emulsion was added to a  
384 beaker containing PBS and stirred at RT for 4 h to allow the dichloromethane to evaporate. The resulting  
385 NPs were washed twice by centrifuging at  $75,600 \times g$  for 50 min at 4 °C followed by resuspension of the  
386 pellet in PBS. Concentration of extracted antigens was measured by HPLC. Dynamic Light Scattering  
387 (DLS) analysis of particle size and PDI was performed using a Malvern Zetasizer Nano-ZS ZEN 3600. All  
388 the nanoparticles loaded with antigens exhibited a particle size distribution ranging between 140-155  
389 nm with a low polydispersity index (<0.15). Recombinant PDC-E2-ILD was manufactured by Genscript  
390 (Piscataway, NJ) using its proprietary E. coli expression system. Mouse IL2 mutein (Fc.IL2m) was  
391 constructed based on the sequence Fc.Mut24 published by Khoryati et al.<sup>13</sup> The protein was  
392 manufactured by Genscript, using its proprietary CHO mammalian expression system. F5111 IC was  
393 produced as previously described<sup>20</sup>.

394

### 395 **Viruses**

396 AAV8-SEAP was manufactured by SAB Tech (Philadelphia, PA, USA) using their proprietary helper  
397 plasmid and AAV8AAP plasmids, and the plasmid containing the gene of interest. The plasmids were  
398 transfected into adherent human embryonic kidney (HEK) 293 cells and harvested 72 hours after  
399 transfection by cell lysis. The clarified supernatant from the harvest was purified by CsCl<sub>2</sub> gradient, and  
400 the AAV8-containing fraction was collected. The viral vector band was assayed by SDS–polyacrylamide  
401 gel electrophoresis (PAGE) gel and silver stain to determine a viral titer, which was then confirmed by  
402 qPCR using ITR-specific primers.

403

### 404 **Mice**

405 Immunologically naïve, female C57BL/6 mice aged 36-52 days (or 17-18g) were purchased from Charles  
406 River Laboratories (Wilmington, MA). Similarly aged B6.Cg-Tg(TcraTcrb)425Cbn/J mice (also known as  
407 OT-II mice), expressing a T cell receptor (TCR) specific for chicken ovalbumin 323-339 peptide  
408 (OVA323-339) in the context of I-Ab resulting in OVA-specific CD4<sup>+</sup> T cells were purchased from Jackson  
409 Laboratories (Bar Harbor, ME). Non-obese diabetic (NOD) NOD/ShiLtJ strain and FoxP3-IRES-mRFP  
410 (C57BL/6-Foxp3tm1Flv/J) mice co-expressing expressing the Foxp3 (forkhead box P3) gene with  
411 monomeric red fluorescent protein (mRFP) were also purchased from Jackson Laboratories. Human Tg-  
412 IL-2/IL-2R $\alpha$ /IL-2R $\beta$  mice carrying knock-out mutations for IL-2, and IL-2 receptor alpha and beta chains  
413 and expressing their human homologues were purchased from Biocytogen (Wakefield, MA). NCG mice  
414 (NOD-*Prkdc*26<sup>emCd52</sup>*Il2rg*<sup>em26Cd22</sup>/NjuCrl) carrying a mutation in *Sirpa* and knockouts of *Prkdc* and *Il2rg*  
415 genes and thus lacking functional/mature T, B, and NK cells, along with reduced macrophage and  
416 dendritic cell function were purchased from Charles River Laboratories. NCG mice were reconstituted  
417 with human PBMC from one of three different donors used in separate studies per manufacturer's  
418 instructions. A similar strain, NSG (NOD.Cg-*Prkdc*scid *Il2rg*tm1Wjl/SzJ), carrying mutations in *Prkdc* and  
419 null allele of the *Il2rg* (*Il2rg*null) lacking functional/mature T, B, and NK cells was purchased from  
420 Jackson Labs, and used in GVHD studies. NOD.c3c4 (NOD.B-(D3Mit93-D3Mit124)(D4Mit114-  
421 D4Mit142)/1112Mrk) mice, known to spontaneously develop autoimmune liver disease and specifically,  
422 primary biliary cholangitis (PBC)<sup>62, 63</sup> were purchased from Jackson Labs and then bred in-house. To  
423 minimize the potential effects of stress, mice were acclimated to the Animal Care Facility at Selecta for  
424 at least three days prior to injection. All the experiments were conducted in strict compliance with NIH  
425 Guide for the Care and Use of Laboratory Animals and other federal, state and local regulations and  
426 were approved by Selecta's IACUC.

427

## 428 **Animal Injections**

429 Mice were injected (i.v., tail vein or retro-orbital plexus) with ImmTOR nanoparticles in the effective  
430 range of 50-300 µg per mouse, or with NP-encapsulated protein or peptide antigens in the effective  
431 range of 0.05-5 µg per mouse, or with Fc.IL2m (i.p. or i.v., retro-orbital plexus) or F5111-IC (i.v.) in the  
432 effective range of 6.25-18.75 µg per mouse. Free ovalbumin (OVA) was administered i.v. in the effective  
433 range of 20-500 µg per mouse. AAV8-SEAP vector injected i.v. at specified doses. NOD (type 1 diabetes  
434 model) and NOD.c3c4 (PBC model) mice were treated with individual therapeutic components or their  
435 combinations as described in Figure Legends three or four times total at 28-day intervals.

436

## 437 **GVHD model**

438 NSG mice (NOD.Cg-Prkdcscid Il2rgtm1Wjl/SzJ; Jackson Laboratory #005557) were irradiated with 1 Gy  
439 from an X-ray irradiator source and then reconstituted with  $1 \times 10^7$  human PBMC. The next day, mice  
440 were treated with a single dose of phosphate buffer saline (vehicle), ImmTOR (100 µg), F5111 IC (9 µg),  
441 or their combination. Animals were assessed for disease activity 3 times per week. Each animal was  
442 assessed for weight loss, posture, activity, fur texture, skin integrity, and paleness on a 2 grade scale as  
443 indicated below. Animals losing more than 20% weight or moribund were removed from the study.

444

| Criteria       | Grade 0 | Grade 1                         | Grade 2                          |
|----------------|---------|---------------------------------|----------------------------------|
| Weight Loss    | <10%    | from $\geq 10\%$ to $\leq 20\%$ | >20%                             |
| Posture        | Normal  | Hunching noted at rest          | Severe hunching impairs movement |
| Activity       | Normal  | Mild to moderately decreased    | Stationary unless stimulated     |
| Fur Texture    | Normal  | Mild to moderate ruffling       | Severe ruffling/poor grooming    |
| Skin Integrity | Normal  | Scaling of paws/tail            | Obvious areas of denuded skin    |
| Paleness       | Normal  | Slight paleness                 | Severe paleness                  |

445

## 446 **T1D model**

447 NOD mice were enrolled in the study at 6-7 weeks of age with the first treatment at week 8. They were  
448 monitored weekly using standard glucometer strips, and mice showing glucose levels >250 mg/dL on 2/3  
449 successive measurements were considered diabetic and those scoring >500 mg/dL twice or >600 mg/dL  
450 once were terminated. All animals in the study were terminated at 35 weeks.

451

## 452 **PBC model**

453 NOD.c3c4 mice were enrolled in the study at 8 weeks and treated for the first time at 10 weeks of age.  
454 After termination at 24 weeks, livers were fixed, embedded in paraffin, sectioned, stained with  
455 hematoxylin and eosin and then slide images were taken. The resulting slides were evaluated by a  
456 certified veterinary pathologist, and microscopic findings were scored as follows: Grade 0 (normal):  
457 finding not present, Grade 1 (minimal): a focal, subtle, or trivial change, Grade 2 (mild): an easily  
458 identifiable change of limited severity and/or distribution, Grade 3 (moderate): an obvious change with  
459 normal tissue remaining, Grade 4 (marked): an extensive change that obliterates much of the normal  
460 tissue, Grade 5 (severe): a maximal change.

461

## 462 **Flow Cytometry (murine liver and spleen cell populations)**

463 Immediately after euthanizing mice (at 1-14 days after initial treatment), livers and spleens were  
464 harvested and rendered into single cell suspensions. Livers were processed via collagenase 4  
465 (Worthington, Lakewood, NJ) enzymatic digest according to manufacturer's recommended protocol.  
466 Spleens were processed via mechanical passage through a 70 µm nylon mesh (ThermoFisher, Waltham,  
467 MA). Next, a red blood cell lysis step was performed for both liver and spleen suspensions for 5 min at

468 room temperature in 150 mM NH<sub>4</sub>Cl, 10 mM KHCO<sub>3</sub>, 10 μM Na<sub>2</sub>-EDTA; washed in PBS, 2% bovine serum;  
469 then filtered again with a 70 μm nylon mesh. Cells were incubated 20 min on ice with anti-CD16/32 (Fc-  
470 block, clone 93, BioLegend, San Diego, CA) then stained with the following antibodies directed toward  
471 cell surface receptors: CD3e-BV421 (BioLegend, clone 145-2C11), CD4-PerCP-Cy5.5 (BioLegend, clone  
472 RM4-5), CD8a-BV510 (BioLegend, clone 53-6.7), CD25-PE-CF594 (BD, clone PC61), NK1.1-AF700 (BD,  
473 clone PK136), CD122-APC (BioLegend, clone TM-B1), and CD132-PE (BioLegend, clone TUGm2).  
474 Adoptively transferred human PBMC were stained with the following antibodies: CD4-PerCP-Cy5.5  
475 (BioLegend, clone SK3), CD8a-APC-Cy7 (BioLegend, clone RPA-T8), CD56-BV421 BioLegend clone HCD56),  
476 CD3e-BV-510 (BioLegend, clone UCHT-1) and CD26-PE-CF594 (BD clone M-A251). After cell surface  
477 labeling cells were then fixed and permeabilized according to manufacturer's recommended protocol  
478 using a FoxP3 Transcription Kit (eBioscience, San Diego, CA). The targeted intracellular markers were  
479 stained with FoxP3-PE (InVitrogen, Waltham, MA), clone FJK-16s, Ki67-A647 (BioLegend, clone 11F6) and  
480 Helios-PE-Cy7 (BioLegend, clone 22F6). Analysis was performed via FACSymphony A3 Cell Analyzer (BD  
481 Biosciences) with subsequent data analysis using FlowJo software (TreeStar, Ashland, OR).

482

### 483 **Whole animal imaging**

484 FoxP3-IRES-mRFP mice were used to measure in vivo FoxP3 expression after treatment with Fc.IL2m  
485 alone or combined with ImmTOR. At various time-points post treatment, images were acquired of the  
486 left side dorsal aspect with the AMI Imaging System charge-coupled-device camera and analyzed with  
487 the Aura 4.0.7 software package (Spectral Instruments Imaging, Tucson, AZ). A region of interest (ROI)  
488 was manually selected based on signal intensity. The area of the ROI was kept constant, and the  
489 intensity was recorded as maximum [photons s<sup>-1</sup> x cm<sup>-2</sup> x sr<sup>-1</sup> (steradian)] within a ROI.

490

### 491 **Methylation Analysis**

492 Murine CD3<sup>+</sup>, CD4<sup>+</sup>CD3<sup>+</sup> and CD4<sup>+</sup>CD25<sup>+</sup> cells were isolated from splenocytes seven days post treatment  
493 via immunomagnetic bead selection (Miltenyi, Gaithersburg, MD) using either negative selection of  
494 untouched CD4<sup>+</sup> T cells or positive selection of CD4<sup>+</sup>CD25<sup>+</sup> T cells (both from Miltenyi). After careful  
495 supernatant removal, accurate cell counting (Countess, ThermoFisher), cell pellets were then snap  
496 frozen in liquid nitrogen, then stored on dry ice. Samples were then sent to EpigenDx (Hopkinton, MA)  
497 for subsequent targeted NextGen bisulfite sequencing panel analysis using their in-house FoxP3  
498 methylation panel N4V1P15 analysis.

499

### 500 **Serum cytokines and FGF21 determination**

501 Serum cytokine concentrations were determined using Meso Scale Discovery (MSD) U-PLEX 10-Assay  
502 SECTOR™ Plates, Linkers, and corresponding capture and detection antibody pairs. Plates were read  
503 using electrochemiluminescence detection on an MESO® QuickPlex SQ 120, with Discovery Workbench  
504 software (version 4.0.13) for analysis (MSD®, Gaithersburg, MD). Assays were performed according to  
505 manufacturer's instructions, and without alterations to the recommended standard curve dilutions.  
506 Serum FGF21 concentration was determined by ELISA using the mouse/rat FGF21 commercial kit from  
507 R&D Systems (Minneapolis, MN). Serum samples were run at a 1:10 dilution.

508

### 509 **Concanavalin A Challenge Model**

510 Concanavalin A (Con A) induced liver toxicity model was employed essentially as earlier described<sup>36</sup>.  
511 Briefly, mice were injected (i.v., r.o.) Con A at 12 mg/kg and then terminally bled at 6 or 12 hours post-  
512 challenge with cytokine levels in serum determined by MSD as described above and liver tissues  
513 collected simultaneously for single-cell suspension analysis by flow cytometry as described above or for  
514 hematoxylin-eosin staining followed by microscopic evaluation.

515

### 516 **Enzyme-linked immunosorbent assay for IgG against AAV8**

517 The 96-well plates were coated overnight with AAV8, washed, and blocked on the following day,  
518 followed by sample incubation (1:40 diluted serum). Plates were then washed, and the presence  
519 of IgG was detected using anti-mouse IgG-specific horseradish peroxidase (HRP; 1:1500; Jackson  
520 ImmunoResearch, West Grove, PA, USA). The presence of rabbit anti-mouse IgG-specific HRP was  
521 visualized using trimethylboron substrate and measured using absorbance at 450 nm with a reference  
522 wavelength of 570 nm. The optical density (OD) observed is proportional to the amount of  
523 anti-AAV8 IgG antibody in a sample and was reported.

524

### 525 **Statistical Analysis**

526 Statistical analyses were performed using GraphPad Prism 9.4.1. To compare the mouse experimental  
527 groups pairwise either multiple t test (for several time-points) or Mann-Whitney two-tailed test (for a  
528 single time-point; individual comparison of two groups presented within the same graph) were used.  
529 Significance is shown for each figure legend (\* –  $p < 0.05$ , \*\* –  $p < 0.01$ ; \*\*\* –  $p < 0.001$ ; \*\*\*\* –  $p <$   
530  $0.0001$ ; not significant –  $p > 0.05$ ). All data for individual experimental groups is presented as mean  $\pm$  SD  
531 (error bars).

532

### 533 **Acknowledgements**

534 We thank Drs. Daniel J. Campbell and Marc A. Gavin for sharing the sequence of Fc.IL2m.

535

### 536 **Author contributions**

537 T.K.K. conceived the idea for the combination therapy, T.K.K. and P.O.I. designed the research and wrote  
538 the manuscript, M.F., A.M., G.R., and C.R. conducted the biological studies, T.C., M.F., G.R., and C.R,  
539 analyzed samples, N.N. and L.D. formulated the antigen nanoparticles, F.F. analyzed the nanoparticles,  
540 N.L. produced the protein products, D.VD and J.B.S. provided F5111 IC, P.G.T. analyzed the histology  
541 slides, T.K.K., P.O.I., S.L., T.C., M.F., G.R., and C.R, analyzed the data, T.K.K., P.O.I., D.VD, and J.B.S. edited  
542 the manuscript.

543

### 544 **Competing interests**

545 a

546

547

- 548 1. Bluestone, J.A. & Tang, Q. Treg cells-the next frontier of cell therapy. *Science* **362**, 154-155  
549 (2018).
- 550 2. Selck, C. & Dominguez-Villar, M. Antigen-Specific Regulatory T Cell Therapy in Autoimmune  
551 Diseases and Transplantation. *Front Immunol* **12**, 661875 (2021).
- 552 3. Janssens, I. & Cools, N. Regulating the regulators: Is introduction of an antigen-specific approach  
553 in regulatory T cells the next step to treat autoimmunity? *Cell Immunol* **358**, 104236 (2020).
- 554 4. Malek, T.R. The biology of interleukin-2. *Annu Rev Immunol* **26**, 453-479 (2008).
- 555 5. Abbas, A.K. The Surprising Story of IL-2: From Experimental Models to Clinical Application. *Am J*  
556 *Pathol* **190**, 1776-1781 (2020).
- 557 6. Klatzmann, D. & Abbas, A.K. The promise of low-dose interleukin-2 therapy for autoimmune and  
558 inflammatory diseases. *Nat Rev Immunol* **15**, 283-294 (2015).
- 559 7. Koreth, J. et al. Interleukin-2 and regulatory T cells in graft-versus-host disease. *N Engl J Med*  
560 **365**, 2055-2066 (2011).

- 561 8. von Spee-Mayer, C. et al. Low-dose interleukin-2 selectively corrects regulatory T cell defects in  
562 patients with systemic lupus erythematosus. *Ann Rheum Dis* **75**, 1407-1415 (2016).
- 563 9. He, J. et al. Efficacy and safety of low-dose IL-2 in the treatment of systemic lupus  
564 erythematosus: a randomised, double-blind, placebo-controlled trial. *Ann Rheum Dis* **79**, 141-  
565 149 (2020).
- 566 10. Hernandez, R., Poder, J., LaPorte, K.M. & Malek, T.R. Engineering IL-2 for immunotherapy of  
567 autoimmunity and cancer. *Nat Rev Immunol* (2022).
- 568 11. Overwijk, W.W., Tagliaferri, M.A. & Zalevsky, J. Engineering IL-2 to Give New Life to T Cell  
569 Immunotherapy. *Annu Rev Med* **72**, 281-311 (2021).
- 570 12. Rao, B.M., Girvin, A.T., Ciardelli, T., Lauffenburger, D.A. & Wittrup, K.D. Interleukin-2 mutants  
571 with enhanced alpha-receptor subunit binding affinity. *Protein Eng* **16**, 1081-1087 (2003).
- 572 13. Bell, C.J. et al. Sustained in vivo signaling by long-lived IL-2 induces prolonged increases of  
573 regulatory T cells. *J Autoimmun* **56**, 66-80 (2015).
- 574 14. Ghelani, A. et al. Defining the Threshold IL-2 Signal Required for Induction of Selective Treg Cell  
575 Responses Using Engineered IL-2 Muteins. *Front Immunol* **11**, 1106 (2020).
- 576 15. Khoryati, L. et al. An IL-2 mutein engineered to promote expansion of regulatory T cells arrests  
577 ongoing autoimmunity in mice. *Sci Immunol* **5** (2020).
- 578 16. de Picciotto, S. et al. Selective activation and expansion of regulatory T cells using lipid  
579 encapsulated mRNA encoding a long-acting IL-2 mutein. *Nat Commun* **13**, 3866 (2022).
- 580 17. Dixit, N. et al. NKTR-358: A novel regulatory T-cell stimulator that selectively stimulates  
581 expansion and suppressive function of regulatory T cells for the treatment of autoimmune and  
582 inflammatory diseases. *J Transl Autoimmun* **4**, 100103 (2021).
- 583 18. Fanton, C. et al. Selective expansion of regulatory T cells by NKTR-358 in healthy volunteers and  
584 patients with systemic lupus erythematosus. *J Transl Autoimmun* **5**, 100152 (2022).
- 585 19. Boyman, O., Surh, C.D. & Sprent, J. Potential use of IL-2/anti-IL-2 antibody immune complexes  
586 for the treatment of cancer and autoimmune disease. *Expert Opin Biol Ther* **6**, 1323-1331 (2006).
- 587 20. Trotta, E. et al. A human anti-IL-2 antibody that potentiates regulatory T cells by a structure-  
588 based mechanism. *Nat Med* **24**, 1005-1014 (2018).
- 589 21. Spangler, J.B. et al. Engineering a Single-Agent Cytokine/Antibody Fusion That Selectively  
590 Expands Regulatory T Cells for Autoimmune Disease Therapy. *J Immunol* **201**, 2094-2106 (2018).
- 591 22. VanDyke, D. et al. Engineered human cytokine/antibody fusion proteins expand regulatory T  
592 cells and confer autoimmune disease protection. *Cell Rep* **41**, 111478 (2022).
- 593 23. Karakus, U. et al. Receptor-gated IL-2 delivery by an anti-human IL-2 antibody activates  
594 regulatory T cells in three different species. *Sci Transl Med* **12** (2020).
- 595 24. Ward, N.C. et al. Persistent IL-2 Receptor Signaling by IL-2/CD25 Fusion Protein Controls  
596 Diabetes in NOD Mice by Multiple Mechanisms. *Diabetes* **69**, 2400-2413 (2020).
- 597 25. Akkaya, B. & Shevach, E.M. Regulatory T cells: Master thieves of the immune system. *Cell*  
598 *Immunol* **355**, 104160 (2020).
- 599 26. Thornton, A.M. & Shevach, E.M. Suppressor effector function of CD4+CD25+ immunoregulatory  
600 T cells is antigen nonspecific. *J Immunol* **164**, 183-190 (2000).
- 601 27. Scheffold, A., Huhn, J. & Hofer, T. Regulation of CD4+CD25+ regulatory T cell activity: it takes (IL-  
602 )two to tango. *Eur J Immunol* **35**, 1336-1341 (2005).
- 603 28. Rosenzweig, M. et al. Immunological and clinical effects of low-dose interleukin-2 across 11  
604 autoimmune diseases in a single, open clinical trial. *Ann Rheum Dis* **78**, 209-217 (2019).
- 605 29. Ooi, J.D. et al. Dominant protection from HLA-linked autoimmunity by antigen-specific  
606 regulatory T cells. *Nature* **545**, 243-247 (2017).
- 607 30. Tang, Q. et al. In vitro-expanded antigen-specific regulatory T cells suppress autoimmune  
608 diabetes. *J Exp Med* **199**, 1455-1465 (2004).

- 609 31. Su, L.F., Del Alcazar, D., Stelekati, E., Wherry, E.J. & Davis, M.M. Antigen exposure shapes the  
610 ratio between antigen-specific Tregs and conventional T cells in human peripheral blood. *Proc*  
611 *Natl Acad Sci U S A* **113**, E6192-E6198 (2016).
- 612 32. Bacher, P. et al. Regulatory T Cell Specificity Directs Tolerance versus Allergy against  
613 Aeroantigens in Humans. *Cell* **167**, 1067-1078 e1016 (2016).
- 614 33. Sands, E. et al. Tolerogenic nanoparticles mitigate the formation of anti-drug antibodies against  
615 pegylated uricase in patients with hyperuricemia. *Nat Commun* **13**, 272 (2022).
- 616 34. Kelly, C.P. et al. TAK-101 Nanoparticles Induce Gluten-Specific Tolerance in Celiac Disease: A  
617 Randomized, Double-Blind, Placebo-Controlled Study. *Gastroenterology* **161**, 66-80 e68 (2021).
- 618 35. Chataway, J. et al. Effects of ATX-MS-1467 immunotherapy over 16 weeks in relapsing multiple  
619 sclerosis. *Neurology* **90**, e955-e962 (2018).
- 620 36. Kishimoto, T.K. Development of ImmTOR Tolerogenic Nanoparticles for the Mitigation of Anti-  
621 drug Antibodies. *Front Immunol* **11**, 969 (2020).
- 622 37. Kishimoto, T.K. et al. Improving the efficacy and safety of biologic drugs with tolerogenic  
623 nanoparticles. *Nat Nanotechnol* **11**, 890-899 (2016).
- 624 38. Maldonado, R.A. et al. Polymeric synthetic nanoparticles for the induction of antigen-specific  
625 immunological tolerance. *Proc Natl Acad Sci U S A* **112**, E156-165 (2015).
- 626 39. Ilyinskii, P.O., Roy, C.J., LePrevost, J., Rizzo, G.L. & Kishimoto, T.K. Enhancement of the  
627 Tolerogenic Phenotype in the Liver by ImmTOR Nanoparticles. *Front Immunol* **12**, 637469  
628 (2021).
- 629 40. LaMothe, R.A. et al. Tolerogenic Nanoparticles Induce Antigen-Specific Regulatory T Cells and  
630 Provide Therapeutic Efficacy and Transferrable Tolerance against Experimental Autoimmune  
631 Encephalomyelitis. *Front Immunol* **9**, 281 (2018).
- 632 41. Mazor, R. et al. Tolerogenic nanoparticles restore the antitumor activity of recombinant  
633 immunotoxins by mitigating immunogenicity. *Proc Natl Acad Sci U S A* **115**, E733-E742 (2018).
- 634 42. Pham, M.N. et al. In Vivo Expansion of Antigen-Specific Regulatory T Cells through Staggered  
635 Fc.IL-2 Mutein Dosing and Antigen-Specific Immunotherapy. *Immunohorizons* **5**, 782-791 (2021).
- 636 43. Wei, H.X. et al. CD4<sup>+</sup> CD25<sup>+</sup> Foxp3<sup>+</sup> regulatory T cells protect against T cell-mediated fulminant  
637 hepatitis in a TGF-beta-dependent manner in mice. *J Immunol* **181**, 7221-7229 (2008).
- 638 44. Meliani, A. et al. Antigen-selective modulation of AAV immunogenicity with tolerogenic  
639 rapamycin nanoparticles enables successful vector re-administration. *Nat Commun* **9**, 4098  
640 (2018).
- 641 45. Ilyinskii, P.O. et al. Enhancement of liver-directed transgene expression at initial and repeat  
642 doses of AAV vectors admixed with ImmTOR nanoparticles. *Sci Adv* **7** (2021).
- 643 46. Baker, R.L., Jamison, B.L. & Haskins, K. Hybrid insulin peptides are neo-epitopes for CD4 T cells in  
644 autoimmune diabetes. *Curr Opin Endocrinol Diabetes Obes* **26**, 195-200 (2019).
- 645 47. Irie, J. et al. NOD.c3c4 congenic mice develop autoimmune biliary disease that serologically and  
646 pathogenetically models human primary biliary cirrhosis. *J Exp Med* **203**, 1209-1219 (2006).
- 647 48. Koarada, S. et al. Genetic control of autoimmunity: protection from diabetes, but spontaneous  
648 autoimmune biliary disease in a nonobese diabetic congenic strain. *J Immunol* **173**, 2315-2323  
649 (2004).
- 650 49. Liao, W., Lin, J.X. & Leonard, W.J. Interleukin-2 at the crossroads of effector responses,  
651 tolerance, and immunotherapy. *Immunity* **38**, 13-25 (2013).
- 652 50. Anderson, R.P., Degano, P., Godkin, A.J., Jewell, D.P. & Hill, A.V. In vivo antigen challenge in  
653 celiac disease identifies a single transglutaminase-modified peptide as the dominant A-gliadin T-  
654 cell epitope. *Nat Med* **6**, 337-342 (2000).
- 655 51. Klareskog, L., Ronnelid, J., Lundberg, K., Padyukov, L. & Alfredsson, L. Immunity to citrullinated  
656 proteins in rheumatoid arthritis. *Annu Rev Immunol* **26**, 651-675 (2008).



- 657 52. Marrack, P. & Kappler, J.W. Do MHCII-presented neoantigens drive type 1 diabetes and other  
658 autoimmune diseases? *Cold Spring Harb Perspect Med* **2**, a007765 (2012).
- 659 53. Roep, B.O., Kracht, M.J., van Lummel, M. & Zaldumbide, A. A roadmap of the generation of  
660 neoantigens as targets of the immune system in type 1 diabetes. *Curr Opin Immunol* **43**, 67-73  
661 (2016).
- 662 54. Rosen, A. & Casciola-Rosen, L. Autoantigens in systemic autoimmunity: critical partner in  
663 pathogenesis. *J Intern Med* **265**, 625-631 (2009).
- 664 55. Lipsky, P.E. et al. Pegloticase immunogenicity: the relationship between efficacy and antibody  
665 development in patients treated for refractory chronic gout. *Arthritis Res Ther* **16**, R60 (2014).
- 666 56. Rosenberg, A.S. Immunogenicity of biological therapeutics: a hierarchy of concerns. *Dev Biol*  
667 (*Basel*) **112**, 15-21 (2003).
- 668 57. Mingozi, F. & High, K.A. Immune responses to AAV vectors: overcoming barriers to successful  
669 gene therapy. *Blood* **122**, 23-36 (2013).
- 670 58. Thornton, A.M. & Shevach, E.M. CD4+CD25+ immunoregulatory T cells suppress polyclonal T cell  
671 activation in vitro by inhibiting interleukin 2 production. *J Exp Med* **188**, 287-296 (1998).
- 672 59. Long, S.A. & Buckner, J.H. Combination of rapamycin and IL-2 increases de novo induction of  
673 human CD4(+)CD25(+)FOXP3(+) T cells. *J Autoimmun* **30**, 293-302 (2008).
- 674 60. Battaglia, M., Stabilini, A. & Roncarolo, M.G. Rapamycin selectively expands CD4+CD25+FoxP3+  
675 regulatory T cells. *Blood* **105**, 4743-4748 (2005).
- 676 61. Daniel, C., Wennhold, K., Kim, H.J. & von Boehmer, H. Enhancement of antigen-specific Treg  
677 vaccination in vivo. *Proc Natl Acad Sci U S A* **107**, 16246-16251 (2010).
- 678 62. Satyanarayana, M. IL-2 treatment can be dangerous. Here's how drug firms are trying to fix it.  
679 *Chemical and Engineering News* **99**, [https://cen.acs.org/pharmaceuticals/biologics/safer-IL2-](https://cen.acs.org/pharmaceuticals/biologics/safer-IL2-cancer-immunotherapy-autoimmunity/99/i12)  
680 [cancer-immunotherapy-autoimmunity/99/i12](https://cen.acs.org/pharmaceuticals/biologics/safer-IL2-cancer-immunotherapy-autoimmunity/99/i12) (2021).
- 681 63. Lee, W.W. et al. Virus infection drives IL-2 antibody complexes into pro-inflammatory agonists in  
682 mice. *Sci Rep* **6**, 37603 (2016).
- 683 64. Long, S.A. et al. Rapamycin/IL-2 combination therapy in patients with type 1 diabetes augments  
684 Tregs yet transiently impairs beta-cell function. *Diabetes* **61**, 2340-2348 (2012).
- 685 65. Quinn, J. et al. Expression and lipoylation in Escherichia coli of the inner lipoyl domain of the E2  
686 component of the human pyruvate dehydrogenase complex. *Biochem J* **289** ( Pt 1), 81-85 (1993).

687

688

## 689 Figure Legends

690 **Figure 1. Expansion of splenic Tregs by ImmTOR and IL-2 mutein.** **A.** Dynamics of Treg induction by  
691 ImmTOR, Treg-biased IL-2 mutein (Fc.IL2m) or the combination thereof. Groups of mice (n= 3-7 mice per  
692 timepoint) were treated as described, and spleens were harvested at times indicated, processed to single-  
693 cell suspension, stained, and analyzed for CD3<sup>+</sup>CD4<sup>+</sup>CD25<sup>+</sup>FoxP3<sup>+</sup> Treg abundance by flow cytometry. This  
694 graph is a summary of four independent experiments. Error bars indicate mean +/- standard deviation  
695 (SD). **B.** Representative graph of a 7-day timepoint shown in **A.** This graph is a summary of 2 independent  
696 experiments (n=7 per group). Error bars indicate mean +/- SD. **C.** Dose-dependence of Treg induction by  
697 Fc.IL2m alone or combined with ImmTOR. Groups of mice (n=4 per cohort) were treated with ascending  
698 doses of 9, 18, or 27 µg of Fc.IL2m, alone or combined with 100 µg ImmTOR. Seven days after treatment,  
699 mice were sacrificed and harvested spleens were then evaluated for total number of Tregs, proliferating  
700 (Ki-67<sup>+</sup>) Tregs, and Helio<sup>+</sup> stable Tregs by flow cytometry. Error bars indicate mean +/- SD. **D.** Whole animal  
701 fluorescence imaging of transgenic mice expressing mRFP under control of the Foxp3 promoter. Mice  
702 were treated with either Fc.IL2m alone (top row) or with Fc.IL2m+ImmTOR (bottom row) and analyzed 7  
703 days after treatment. **E.** Effector cell populations induced by ascending doses of Fc.IL2m alone or in  
704 combination with ImmTOR, as described in **C.** Total numbers of CD8<sup>+</sup> cytolytic T lymphocytes (CTL;  
705 CD3<sup>+</sup>CD8<sup>+</sup>), CD4<sup>+</sup> T effector (Teff; CD3<sup>+</sup>CD4<sup>+</sup>CD25<sup>-</sup>), and NK (CD3<sup>-</sup>NK1.1<sup>+</sup>) cells are shown. Error bars  
706 indicate mean +/- SD. **F.** Ratios of total number of Tregs relative to CTL, Teff, and NK cells after treatment  
707 with ascending doses of Fc.IL2m alone or in combination with ImmTOR, as described in **C.** Ratios of the  
708 value for each experimental group vs untreated control are indicated above the bars in **C, E** and **F.**  
709 Representative graphs from one of two studies with similar results are shown. Error bars indicate mean  
710 +/- SD. Statistical significance: \* p < 0.05, \*\* p < 0.01, \*\*\* p < 0.001.

711 **Figure 2. Induction of Tregs by ImmTOR and human IL-2/anti-IL-2 antibody fusion protein in humanized**  
712 **mice.** Mice were treated with F5111 IC (18.75 µg) alone or combined with ImmTOR (100 µg), and  
713 splenocytes were harvested at 7 days post treatment and analyzed by flow cytometry. **A.** Human PBMC-  
714 engrafted NSG (huPBMC) mice were treated at 1.5-3 weeks after PBMC engraftment. Treg  
715 (CD3<sup>+</sup>CD4<sup>+</sup>CD25<sup>+</sup>FoxP3<sup>+</sup>), CTL (CD3<sup>+</sup>CD8<sup>+</sup>), and NK cell (CD3<sup>-</sup>CD56<sup>+</sup>) populations are presented as absolute  
716 cell numbers, percent Tregs out of total T cells, and relative ratios of Treg:effector cells. A summary of 3  
717 experiments using different PBMC donors is shown (n=10 per group). Error bars indicate mean +/- SD. **B.**  
718 ImmTOR mitigates disease exacerbation by F5111 IC and prolongs survival in a HuPBMC model of GVHD.  
719 NSG mice were irradiated and then reconstituted with 1x10<sup>7</sup> human PBMC. The next day, mice were  
720 treated with a single dose of saline, ImmTOR (100 µg), F5111 IC (9 µg), or the combination. Control  
721 animals were irradiated but did not receive HuPBMC. **C.** Transgenic mice expressing human IL-2, IL-2Rα  
722 and IL-2Rβ mice were treated as described (5 animals/group) or left untreated (3 animals/group). Treg,  
723 Helios<sup>+</sup> stable Treg, CTL, and NK total and proliferating cell populations are shown as fractions, absolute  
724 cell numbers, or relative ratios. A representative experiment of 2 independent studies that resulted in a  
725 similar outcome is shown. Error bars indicate mean +/- SD. Ratios of the value for each experimental  
726 group vs untreated control are indicated above the bars in **A** and **C.** Statistical significance: \* p < 0.05, \*\*  
727 p < 0.01, \*\*\* p < 0.001.

728 **Figure 3. Efficacy of ImmTOR + Treg-biased IL-2 mutein in a concanavalin A-induced model of**  
729 **autoimmune hepatitis.** **A.** Female C57BL/6 mice (n=5 per cohort) were either left untreated or treated  
730 with ImmTOR (200 µg) and Fc.IL2m (9 µg) individually or in combination. Mice were challenged 4 days  
731 later with 12 mg/kg of concanavalin A (Con A) or left unchallenged (no Con A). At 12 hours after Con A

732 challenge, serum was drawn for cytokine analysis and livers were harvested and hepatic T cells were  
733 assessed by flow cytometry. **A.** Activated (CD69<sup>+</sup>) and highly activated (CD69<sup>high</sup>) T cells (CD3<sup>+</sup>) and CTL  
734 (CD3<sup>+</sup>CD8<sup>+</sup>) are shown either as fractions of total or as absolute cell numbers. A representative experiment  
735 of 4 studies that resulted in similar outcomes is shown. Error bars indicate mean +/- SD. **B.** Mice were  
736 treated as in **A.** Serum IFN- $\gamma$ , IL-6, and KC/GRO levels at 12 hours after Con A challenge (summary of 2  
737 independent experiments, n=8-10 per group). Error bars indicate mean +/- SD. **C.** FGF21 serum levels prior  
738 to and after Con A challenge. A representative experiment of 4 studies that resulted in similar outcomes  
739 is shown (n=4 per group). Error bars indicate mean +/- SD. Statistical significance: \* p < 0.05, \*\* p < 0.01,  
740 \*\*\* p < 0.001, \*\*\*\* p < 0.0001.

741 **Figure 4. Induction of OVA-specific Tregs by combination of ImmTOR, IL-2 mutein, and ovalbumin.** OVA-  
742 specific OT-II T cells from CD45.2<sup>+</sup> donors were adoptively transferred into CD45.1<sup>+</sup> C57BL/6 recipient mice  
743 (n=3 per group) and 24 hours later treated with different combinations of ImmTOR (100  $\mu$ g), Fc.IL2m (9  
744  $\mu$ g), and either free ovalbumin (OVA, 5-500  $\mu$ g) or nanoparticle-encapsulated OVA (NP-OVA, 0.05-5  $\mu$ g) or  
745 left untreated. At 7 days after treatment, spleens were harvested and analyzed by flow cytometry. **A.** Total  
746 splenic and OVA-specific Tregs induced by combinations of ImmTOR, Fc.IL2m, and free OVA (n=3/group).  
747 Error bars indicate mean +/- SD. **B.** Antigen dose-dependent induction of OVA-specific donor Tregs by the  
748 combination of ImmTOR, Fc.IL2m, and free OVA. The concurrent expansion of recipient Tregs was  
749 unaffected by OVA. Total numbers of CD45.1<sup>+</sup> (recipient) and CD45.2<sup>+</sup> (OT-II donor) Tregs are shown (n=3  
750 per group). Error bars indicate mean +/- SD. **C.** Antigen dose-dependent induction of OVA-specific donor  
751 or recipient Tregs by the combination of ImmTOR, Fc.IL2m, and either free OVA or NP-OVA. Total number  
752 of CD45.1<sup>+</sup> (recipient) and CD45.2<sup>+</sup> (OT-II donor) Tregs and the fractions of total cells are shown (n=6-7  
753 per group). Error bars indicate mean +/- SD. Statistical significance: \*\* p < 0.01.

754 **Figure 5. Mitigation of antibody response to AAV vector by combination treatment with ImmTOR and**  
755 **IL-2 mutein.** C57BL/6 mice (5 per group) were injected with AAV8 on Day 0 (2.7E12 vg/kg) and Day 56  
756 (5.0E12 vg/kg) either alone or in combination with ImmTOR (50-200  $\mu$ g) and/or Fc.IL2m (9  $\mu$ g). Animals  
757 were bled at the indicated timepoints indicated, and serum was analyzed for the presence of anti-AAV8  
758 IgG antibody by ELISA. Timing of the second AAV8 administration is shown by arrows. Error bars indicate  
759 mean +/- SD. Statistical analyses are shown in Supplementary Table ST1.

760 **Figure 6. Diabetes prevention by combination treatment with ImmTOR, IL-2 mutein, and nanoparticle-**  
761 **encapsulated hybrid insulin peptide 6.9 (NP-HIP6.9).** Female NOD mice (n=10 per group) were left  
762 untreated or treated with ImmTOR (100  $\mu$ g) only or ImmTOR and Fc.IL2m (9  $\mu$ g), in the absence or  
763 presence of NP-encapsulated hybrid insulin peptide 6.9 (NP-HIP6.9, 1  $\mu$ g) starting at week 8 of age (4  
764 treatments at 4-week intervals, shown as arrows). Mice were monitored up to 35 weeks of age. Blood  
765 glucose was measured weekly, and mice scoring >250 mg/dL on 2/3 successive measurements were  
766 considered diabetic and those scoring >500 mg/dL twice or >600 mg/dL once were terminated. Fractions  
767 of diabetic mice (**A**) and individual mouse blood glucose levels (**B**) are shown with statistical significance  
768 indicated. Statistical significance: \*\* p < 0.01.

769 **Figure 7. Efficacy of ImmTOR + IL-2 mutein with and without nanoparticle-encapsulated PDC-E2 antigen**  
770 **in a mouse model of primary biliary cholangitis.** **A.** Schedule of treatment of NOD.c3c4 mice. Mice were  
771 treated with three monthly doses as indicated starting at 10 weeks of age. **B.** Disease scores. Paraffin-  
772 embedded liver sections were stained with hematoxylin & eosin of NOD.c3c4 mice and analyzed by an  
773 independent veterinary pathologist. Bile duct degeneration, biliary hypertrophy, and liver inflammation

774 were graded on a 5-point severity scale as described in Materials and Methods. **C-J**. Histology.  
775 Representative histology sections from female (**C-F**) and male (**G-J**) mice are shown at 5x magnification.  
776 **C**. Untreated female. Vast majority of bile ducts show marked ectasia, some with intraluminal  
777 accumulations of neutrophils (arrow), and dense biliary and intrahepatic mononuclear inflammatory  
778 infiltrate (\*). **D**. ImmTOR-treated female. Marked biliary mononuclear cell inflammation (\*) occasionally  
779 forming follicles (arrowhead) and multifocal duct ectasia (arrow). **E**. ImmTOR-IL-treated female. Biliary  
780 mononuclear cell inflammation with small foci of peri-biliary hypercellularity (\*) and multifocal duct  
781 ectasia (arrow). **F**. ImmTOR-IL plus NP/PDC-E2.ILD-treated female. Mild biliary mononuclear cell  
782 inflammation with small foci of peri-biliary hypercellularity (\*) and mild biliary hyperplasia or bile duct  
783 ectasia (arrow). **G**. Untreated male. Marked biliary mononuclear cell inflammation with densely cellular  
784 accumulations surrounding bile ducts (\*), with follicle formation (arrowhead), moderate bile duct  
785 hyperplasia and bile duct ectasia (arrow). **H**. ImmTOR-treated male. Biliary mononuclear cell inflammation  
786 with few foci of peri-biliary hypercellularity (\*) and multifocal duct ectasia (arrow). **I**. ImmTOR-IL-treated  
787 male. Biliary mononuclear cell inflammation with small foci of peri-biliary hypercellularity (\*) and  
788 multifocal duct ectasia (arrow). **J**. ImmTOR-IL plus NP/PDC-E2.ILD-treated male. Minimal biliary  
789 mononuclear cell inflammation, rare foci of peri-biliary hypercellularity and, minimal biliary hyperplasia  
790 or bile duct ectasia (arrow).

791 **Suppl. Fig. 1. CD3, CD4, CD25 and FoxP3 gating strategies.** Representative dot plots are shown for  
792 phenotyping of untreated mice and mice treated with ImmTOR, Fc.IL2m (IL-2 mut), or ImmTOR+Fc.IL2m  
793 combination therapy.

794 **Suppl. Fig. 2. Treg induction by Fc.IL2m +/- ImmTOR in spleen and liver.** **A**. Dose-dependence of Treg  
795 induction by Fc.IL2m alone or combined with ImmTOR. Groups of mice (n=4 per cohort) were treated and  
796 splenic Tregs were analyzed as described in Figure 1C. Fractions of Tregs out of total T helpers and of  
797 proliferating (Ki67<sup>+</sup>) and Helios<sup>+</sup> stable Tregs out of total Tregs are shown. Error bars indicate mean +/- SD.  
798 **B**. Dynamics of hepatic Treg induction by combination treatment with ImmTOR and IL-2 mutein. Groups  
799 of mice (n=3-7 per cohort per time-point) were treated with ImmTOR, Fc.IL2m or the combination thereof.  
800 Livers were harvested on Day 4, 7, or 14, as indicated, processed to single-cell suspension, stained, and  
801 analyzed by flow cytometry. Graphs represent summaries of 4 independent experiments. Total Treg  
802 numbers and ratio of Treg-to-CD8<sup>+</sup> T cells are shown. Error bars indicate mean +/- SD. Statistical  
803 significance: \* p < 0.05, \*\* p < 0.01, \*\*\* p < 0.001.

804 **Suppl. Fig. 3. Treg responses to Fc.IL2m +/- ImmTOR.** **A, B**. Dynamics of circulating Fc.IL2m (**A**) and CD4<sup>+</sup>  
805 T cell IL-2R $\alpha$  (CD25) expression (**B**) after treatment with ImmTOR, Fc.IL2m, or the combination thereof.  
806 Groups of mice (n=3-6 per group for each timepoint) were treated with Fc.IL2m and/or ImmTOR at the  
807 indicated doses. The graphs represent summaries of 3 independent experiments. Error bars indicate  
808 mean +/- SD. **C**. Demethylation of Treg-specific genes after treatment with ImmTOR, Fc.IL2m or their  
809 combination. Groups of mice (n=9 per group) were treated with Fc.IL2m and/or ImmTOR at the doses  
810 indicated, CD4<sup>+</sup> T cells were isolated after 7 days, and status of methylation within FoxP3, EOS, and Helios  
811 genes was assessed within multiple CpG islands as indicated. The graphs represent summaries of 2  
812 independent experiments. Statistical significance: \* p < 0.05, \*\* p < 0.01, \*\*\* p < 0.001, \*\*\*\* p < 0.0001.

813 **Suppl. Fig. 4. ImmTOR improves GVHD disease scores.** NSG mice were irradiated, reconstituted with  
814 HuPBMC and treated as described in Figure 2B legend. Disease activity index (DAI) was assessed three  
815 times per week, as described in Materials and Methods.

816 **Suppl. Fig. 5. Effect of ImmTOR and IL-2 mutein on activation of hepatic NK, NKT, neutrophils, and**  
 817 **macrophages after treatment with concanavalin** Female C57BL/6 mice (n=5 per cohort) were either left  
 818 untreated or treated with ImmTOR (200 µg) and Fc.IL2m (9 µg) individually or in combination. Mice were  
 819 challenged 4 days later with 12 mg/kg of concanavalin A (Con A), as described in Figure 3. At 12 hours  
 820 after Con A challenge, serum was drawn for cytokine quantification and livers were harvested and hepatic  
 821 T cells were analyzed by flow cytometry. (A) Fractions or total cell numbers of activated (CD69<sup>+</sup> or CD69<sup>high</sup>)  
 822 NK (CD3<sup>-</sup>NK1.1<sup>+</sup>), NKT (CD3<sup>+</sup>NK1.1<sup>+</sup>) cells, neutrophils (CD11b<sup>+</sup>GR-1<sup>+</sup>), and macrophages (F4/80<sup>+</sup>) are  
 823 shown. (B) Serum concentrations of IFN-γ, IL-6 and CXCL1. (C) Serum concentrations of FGF21. Error bars  
 824 indicate mean +/- SD. Statistical significance: \*\* p < 0.01.

825 **Suppl. Figure 6. Mitigation of antibody response to high AAV vector dose by combination treatment**  
 826 **with ImmTOR and IL-2 mutein.** (A) C57BL/6 mice (n=6 per cohort) were treated with a single high vector  
 827 dose of 5E13 vg/kg on Day 0 with or without ImmTOR (200 µg) and/or Fc.IL2m (9 µg). Groups treated  
 828 with Fc.IL2m received additional Fc.IL2m doses on Days 28, 56, and 84. Anti-AAV8 IgG antibodies were  
 829 assessed via serum blood draw on various days as indicated. (B) Spleens were harvested at the timepoints  
 830 shown and processed into single-cell suspensions that were analyzed by flow cytometry. Populations are  
 831 presented as fractions, absolute cell numbers, and relative ratios. Graphs are the summary of 2 identical  
 832 studies with similar results. Error bars indicate mean +/- SD. Statistical analyses shown in Supplementary  
 833 Table ST2.

834 **Supplementary Table ST1.** Comparison of anti-AAV IgG levels in mice treated with ImmTOR alone (50-200  
 835 µg) vs. animals treated with ImmTOR (50-200 µg) combined with Fc.IL2m (9 µg) as described in legend to  
 836 Figure 5. Mean values ± SD are shown for all time-points and statistical significance indicated (unpaired t-  
 837 test; ns – not significant).

|                     | Day 12         | Day 19         | Day 33         | Day 47         | Day 61         | Day 75         | Day 91         | Day 104        | Day 117        |
|---------------------|----------------|----------------|----------------|----------------|----------------|----------------|----------------|----------------|----------------|
| ImmTOR              | 0.08 ±<br>0.02 | 0.10 ±<br>0.11 | 0.40 ±<br>0.57 | 0.42 ±<br>0.58 | 0.48 ±<br>0.54 | 0.59 ±<br>0.67 | 0.80 ±<br>0.56 | 0.94 ±<br>0.57 | 0.91 ±<br>0.54 |
| ImmTOR +<br>Fc.IL2m | 0.07 ±<br>0.02 | 0.07 ±<br>0.01 | 0.08 ±<br>0.02 | 0.08 ±<br>0.01 | 0.07 ±<br>0.01 | 0.08 ±<br>0.03 | 0.06 ±<br>0.02 | 0.07 ±<br>0.02 | 0.08 ±<br>0.02 |
| P value             | ns             | ns             | 0.039          | 0.036          | 0.0061         | 0.0065         | <0.0001        | <0.0001        | <0.0001        |

838  
 839 **Supplementary Table ST2.** Statistical significance of differences between all the splenocyte cell  
 840 populations (fractions, absolute numbers and their ratios) shown in Supplementary Fig. 6B. The values  
 841 for the group of mice treated with AAV and ImmTOR and Fc.IL2m combination vs. all other experimental  
 842 groups at all time-points is shown. \* p < 0.05, \*\* p < 0.01, ns – not significant.

|                                        | AAV   |       |       | AAV + ImmTOR |       |       | AAV + IL-2mut |       |       |
|----------------------------------------|-------|-------|-------|--------------|-------|-------|---------------|-------|-------|
|                                        | Day 1 | Day 4 | Day 7 | Day 1        | Day 4 | Day 7 | Day 1         | Day 4 | Day 7 |
| Treg fraction (% of CD4 <sup>+</sup> ) | **    | **    | **    | **           | **    | **    | ns            | ns    | **    |
| CTL, total                             | ns    | ns    | ns    | ns           | ns    | **    | ns            | **    | *     |
| Treg:CTL ratio                         | **    | **    | **    | **           | **    | **    | ns            | ns    | **    |
| Plasmablasts (% of CD19 <sup>+</sup> ) | ns    | **    | *     | ns           | ns    | **    | *             | **    | *     |
| Plasmablasts, total                    | ns    | *     | ns    | ns           | ns    | **    | *             | **    | ns    |
| T effectors, total                     | *     | **    | ns    | ns           | ns    | *     | ns            | **    | *     |

Figure 1

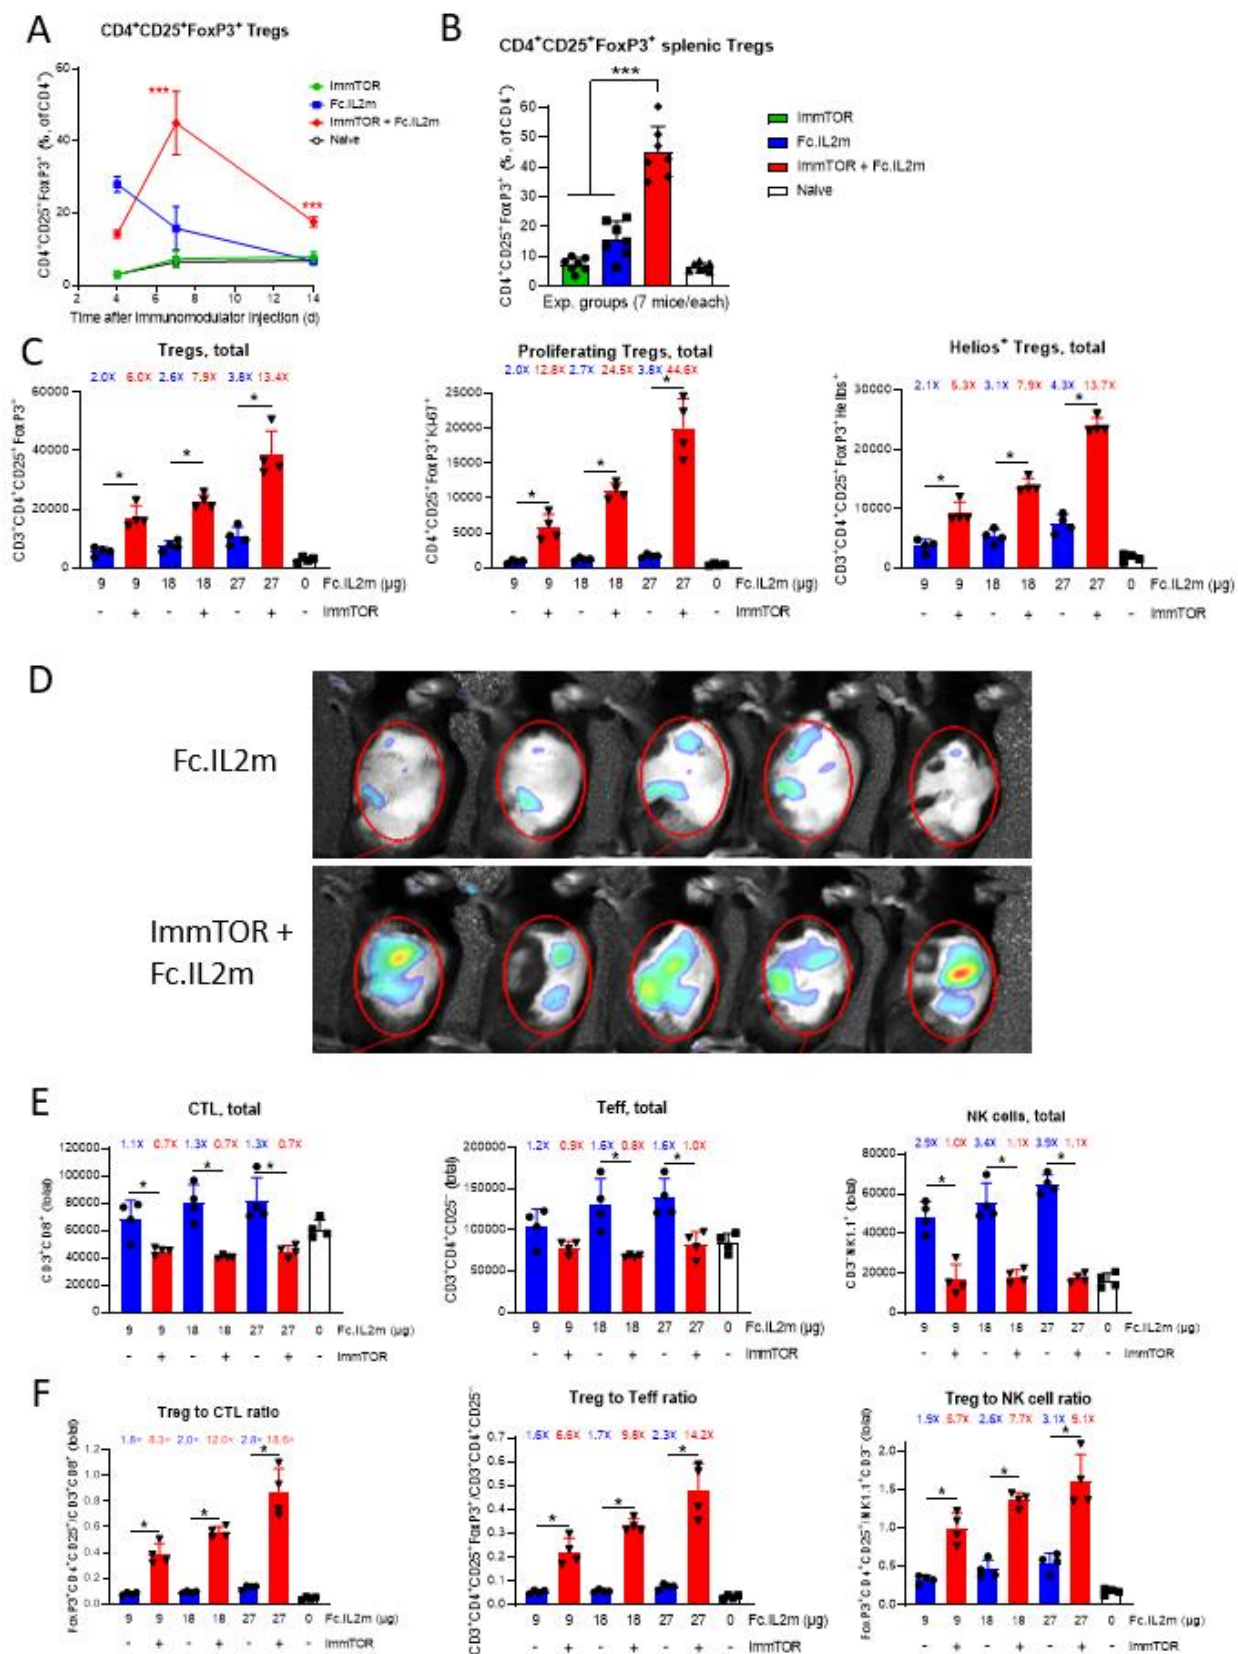

Figure 2

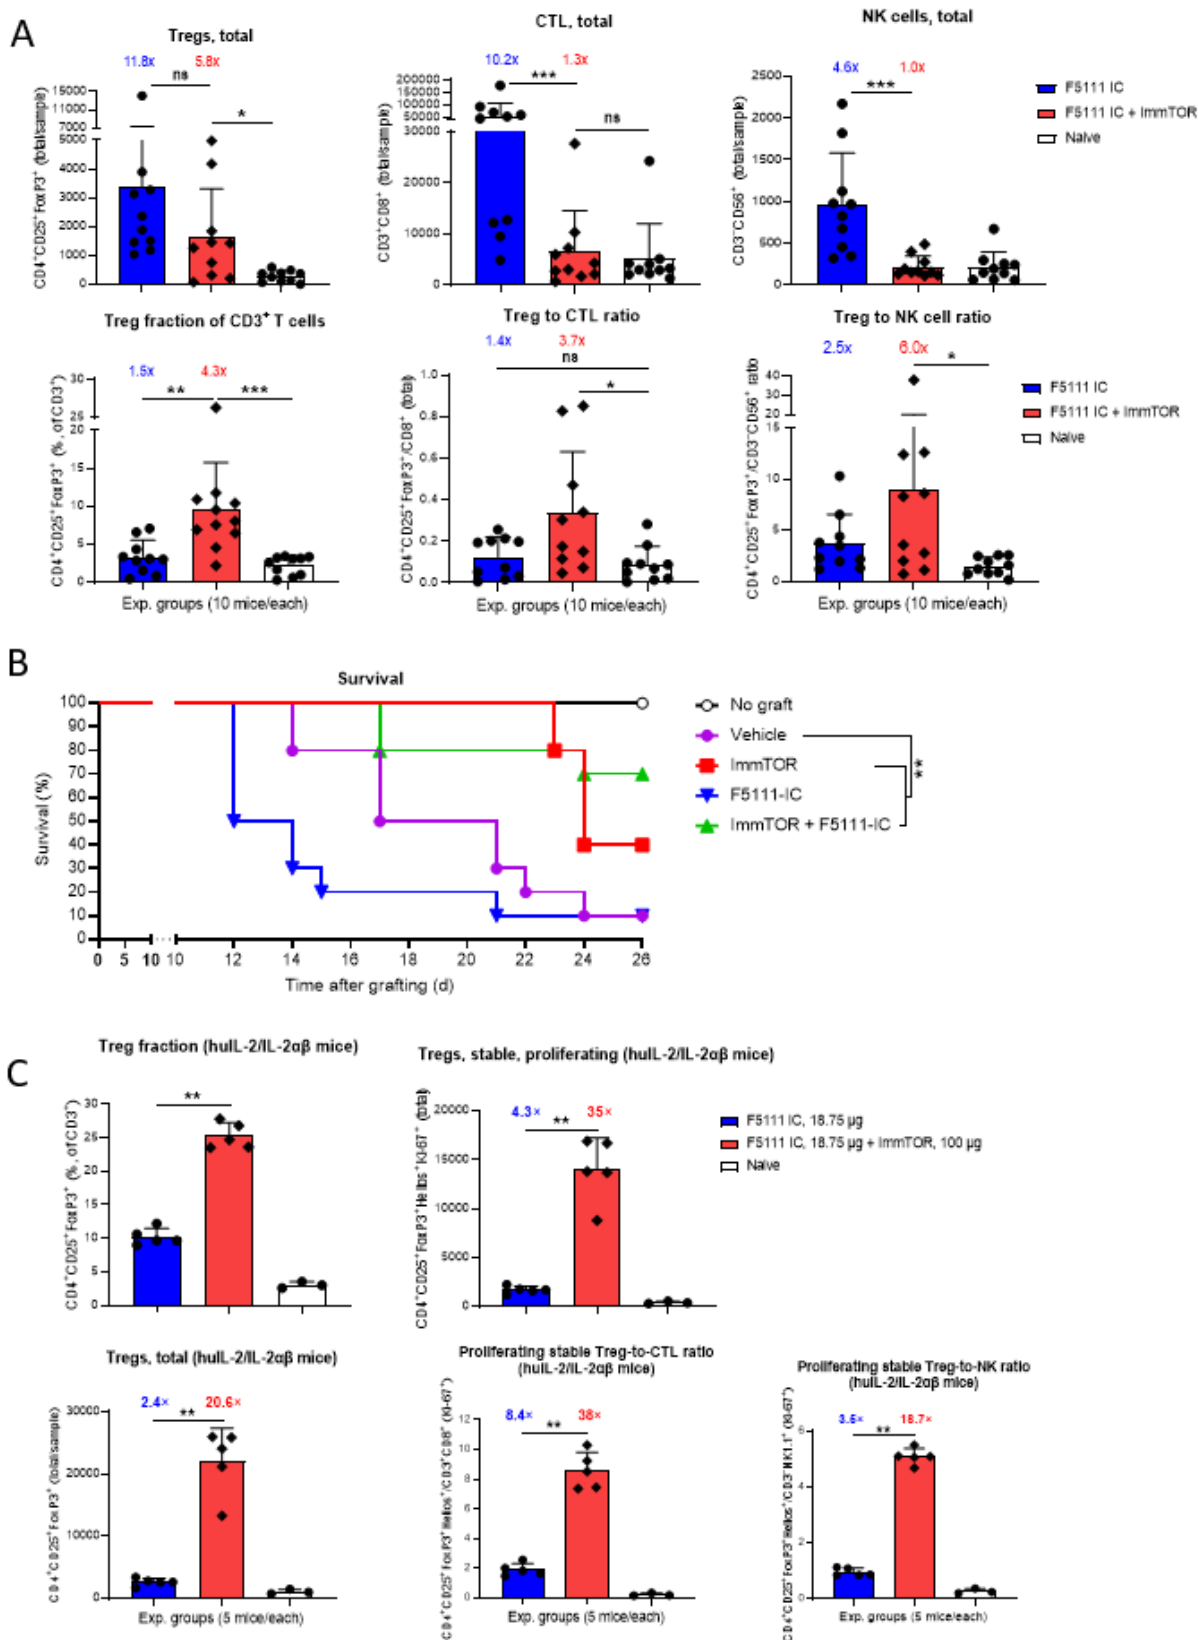

Figure 3

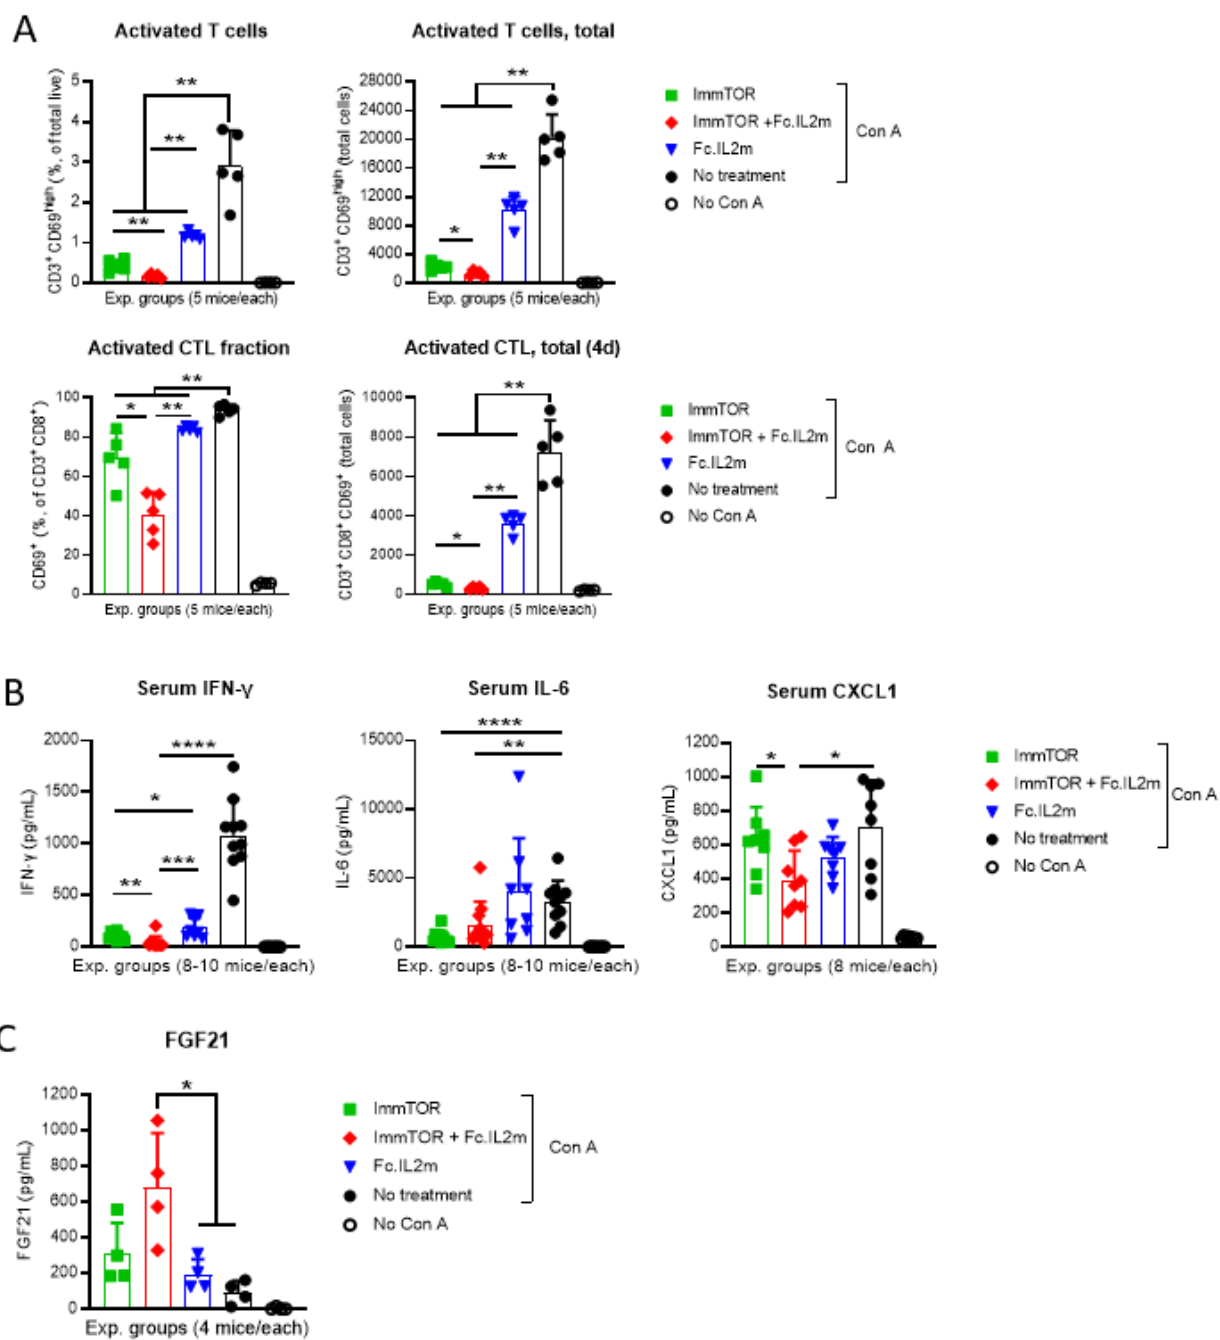



Figure 4

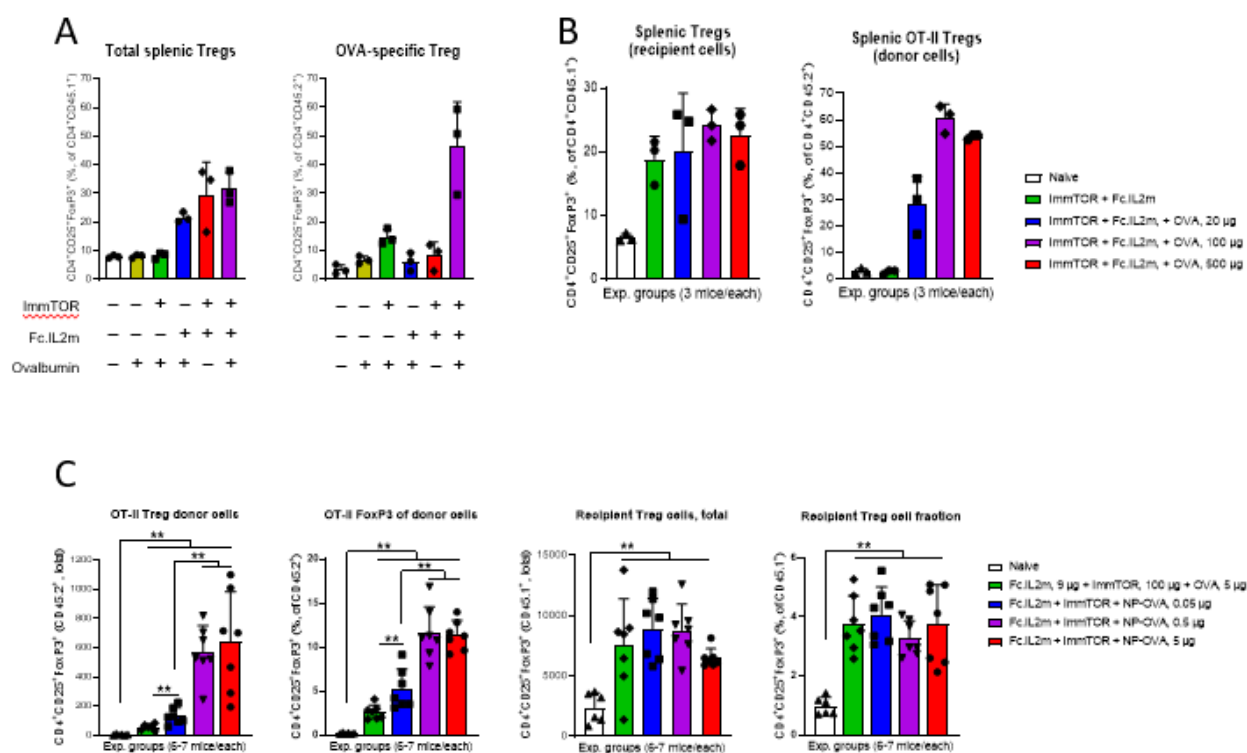

Figure 5

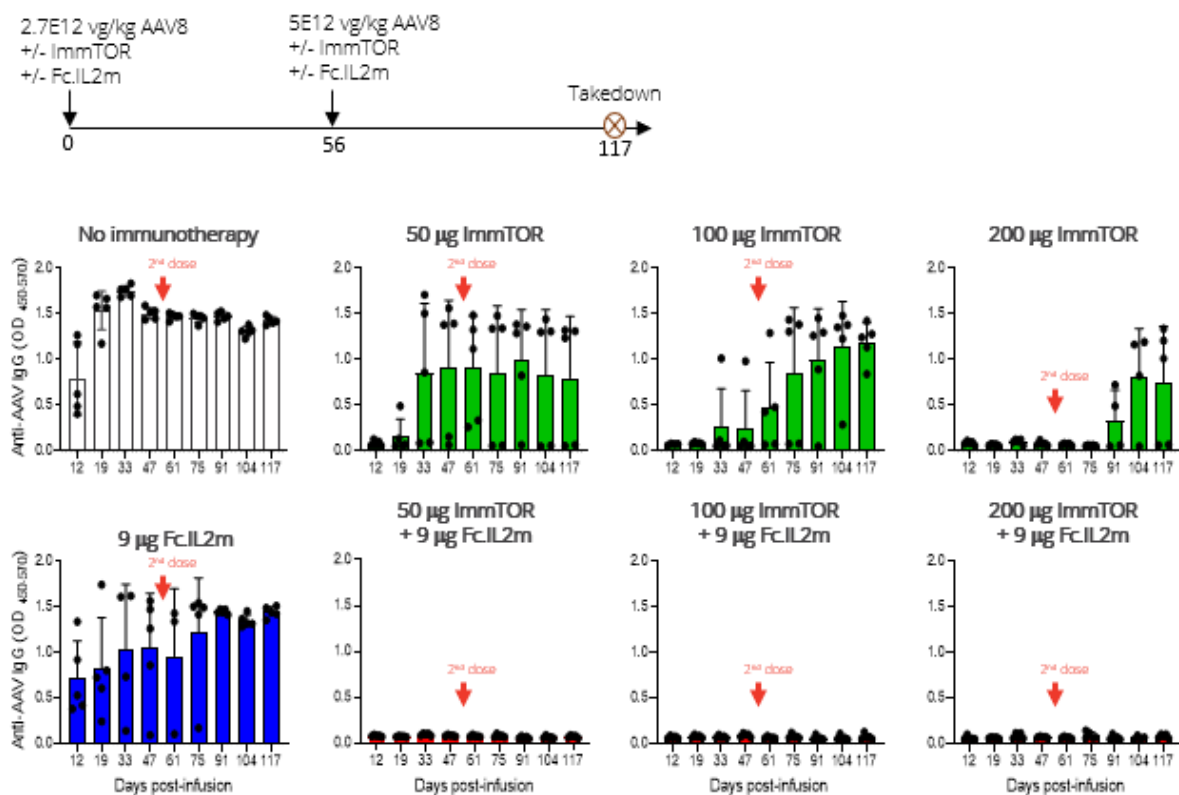

Figure 6

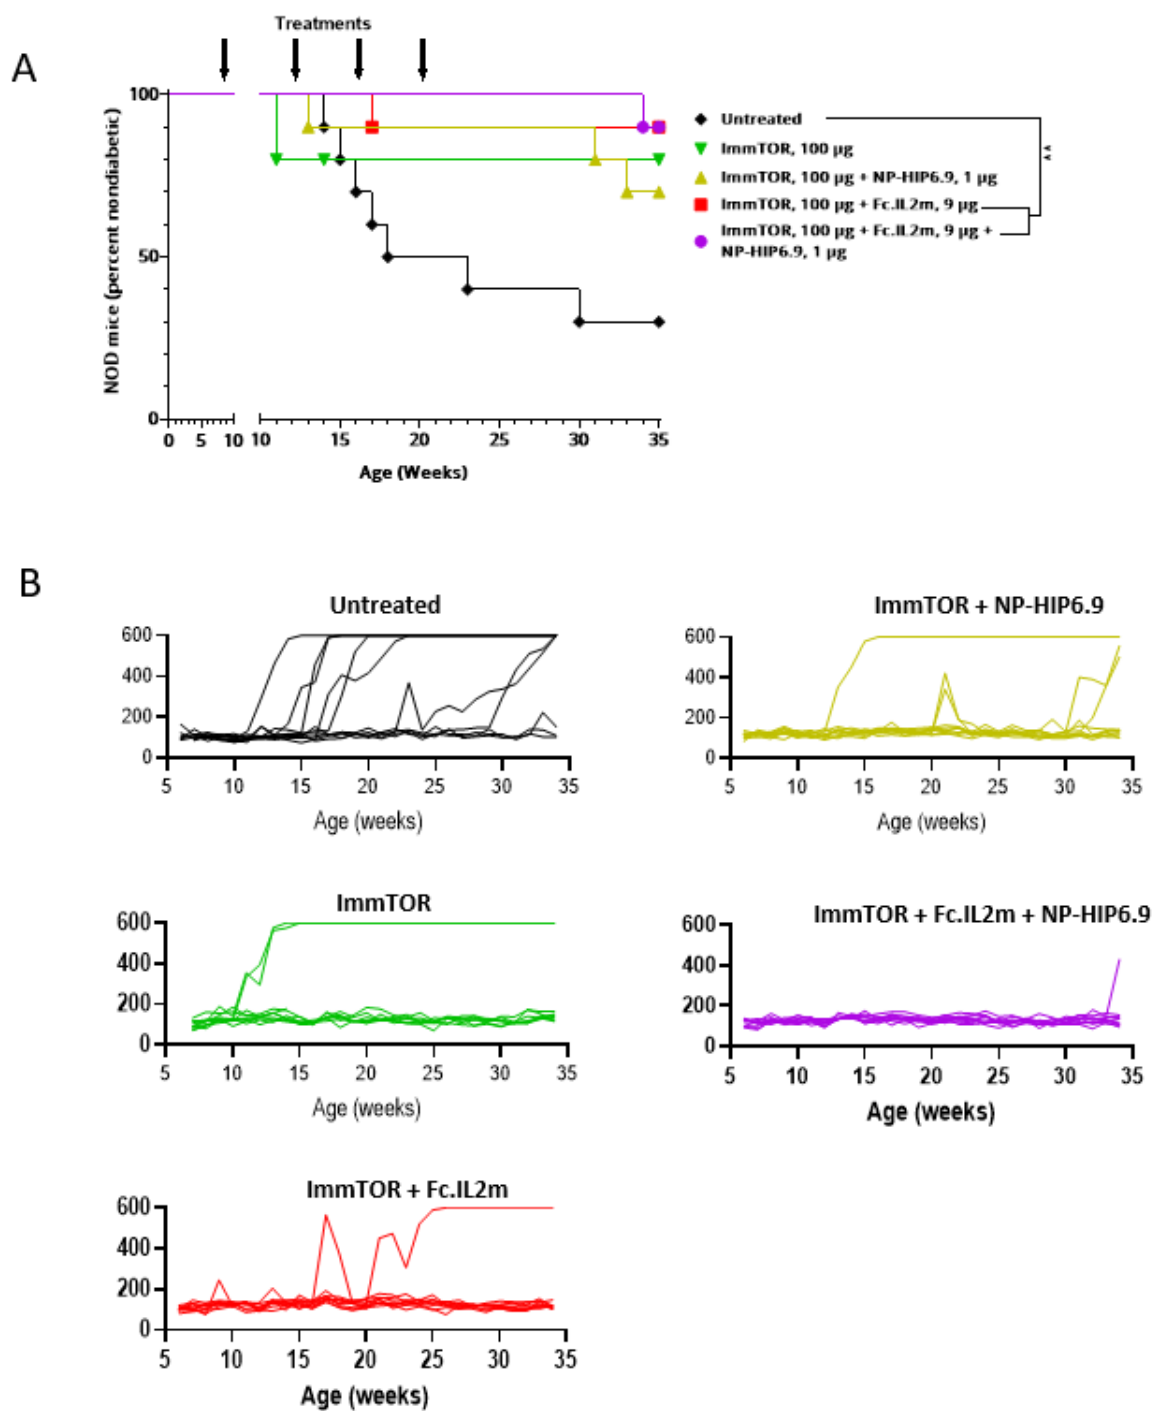

Figure 7

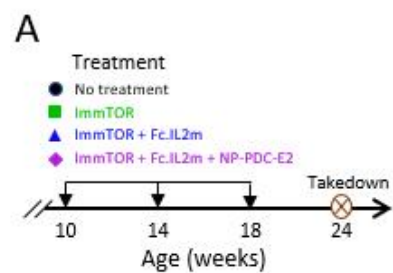

**B** Bile duct epithelium degeneration

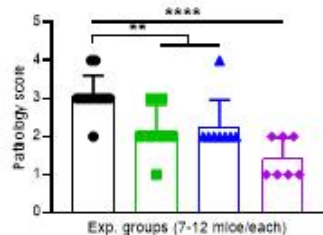

Biliary hyperplasia/hypertrophy

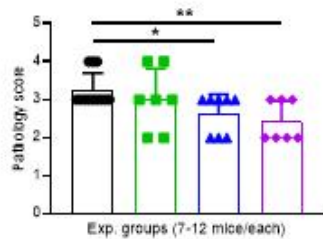

Liver Inflammation (MC, biliary)

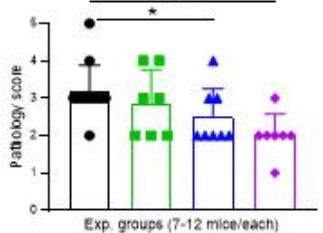

Female

Male

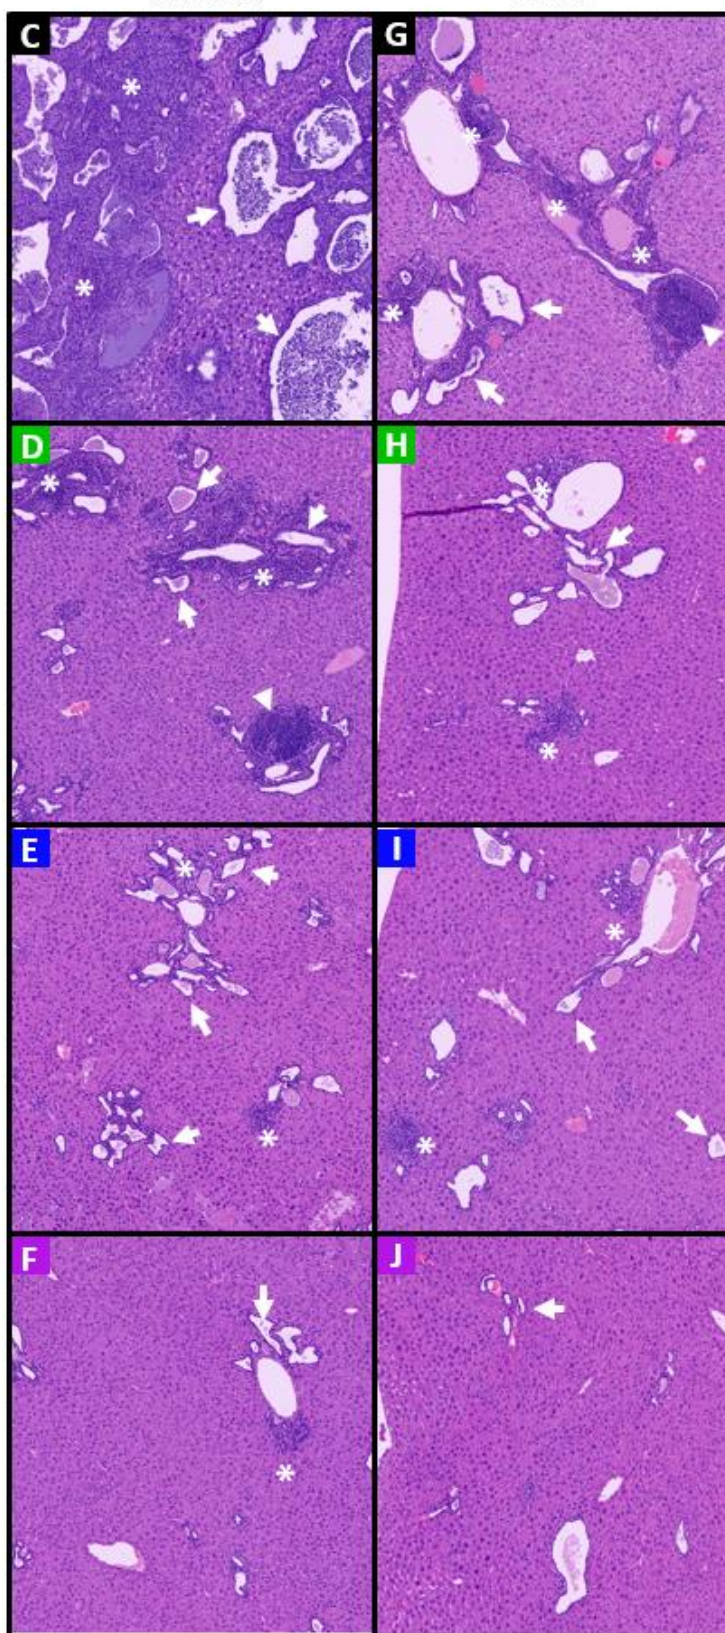

## Supplemental Figure 1

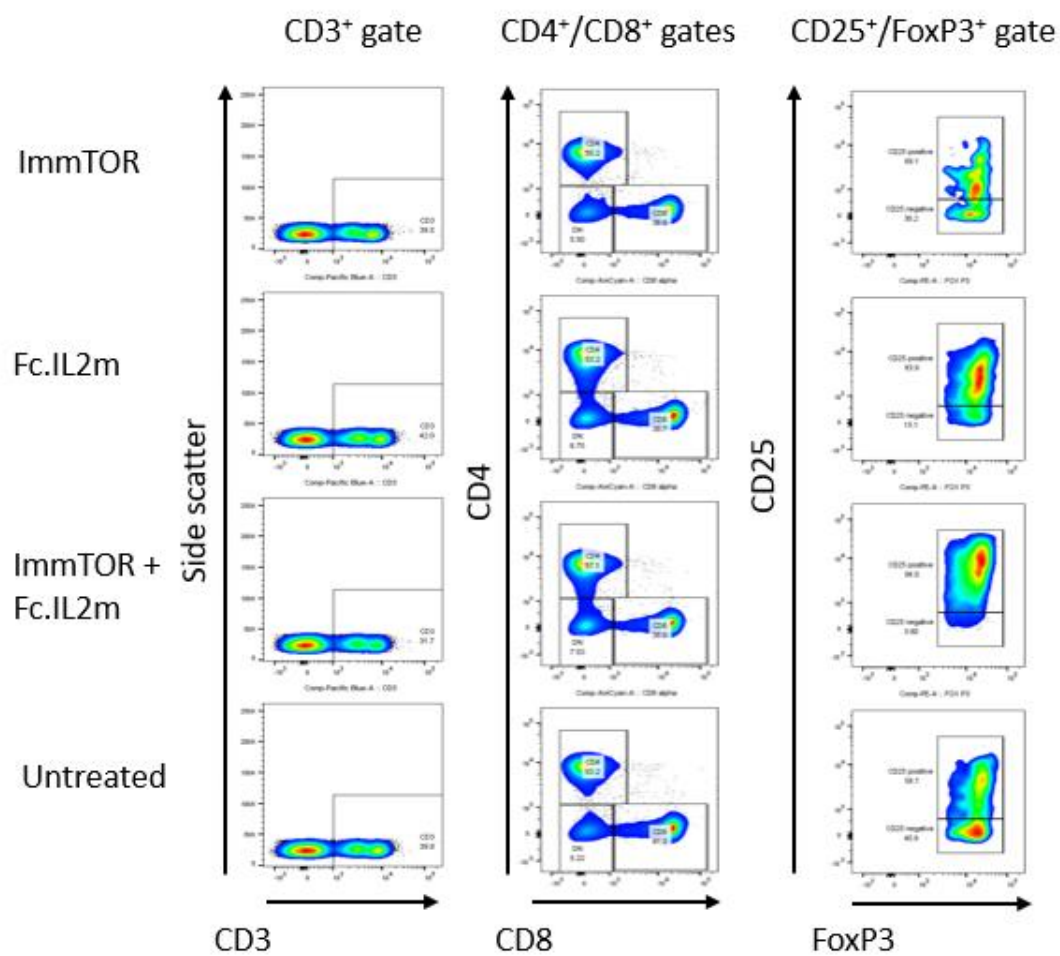

## Supplementary Figure 2

A

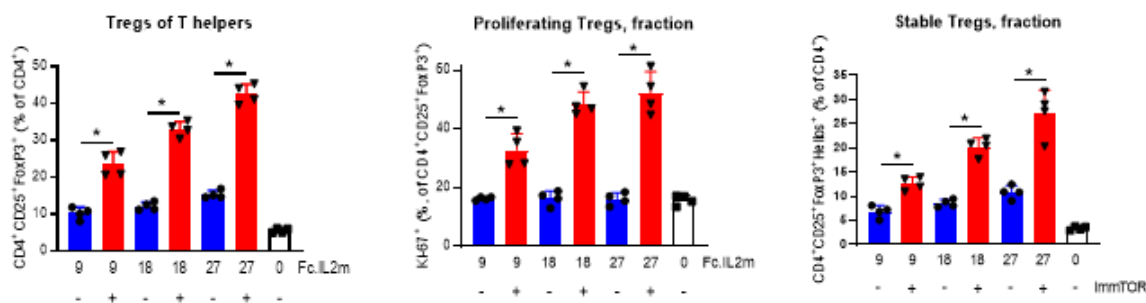

B

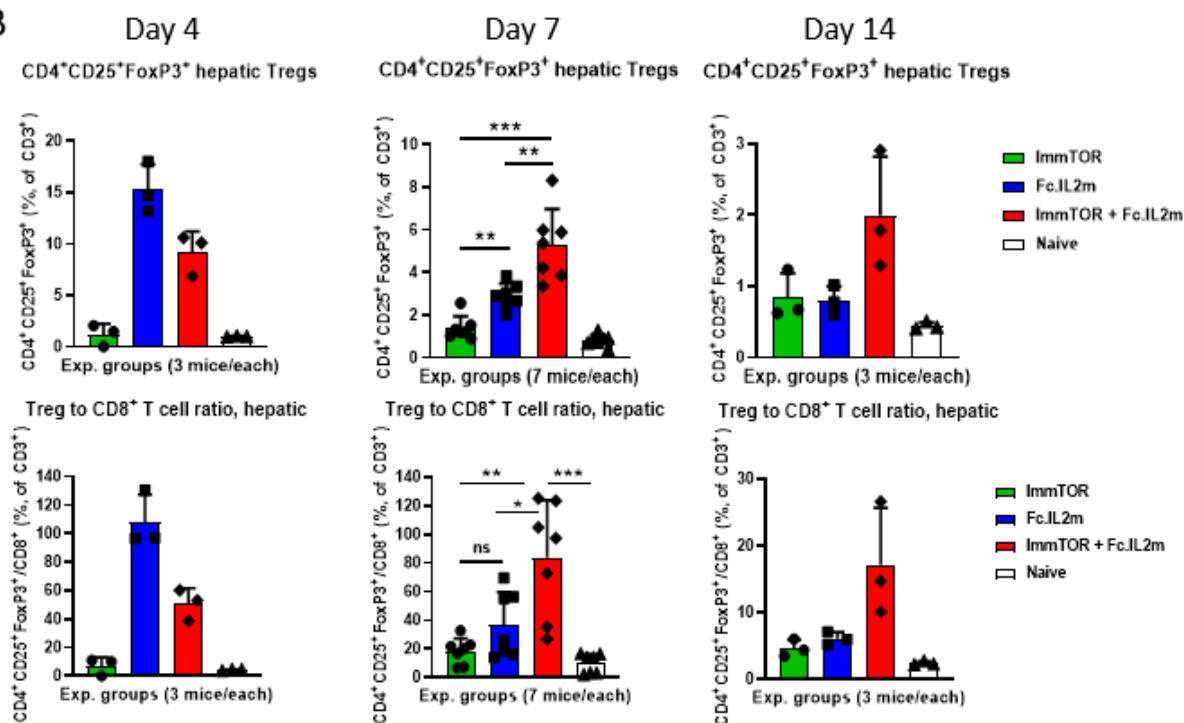

## Supplemental Figure 3

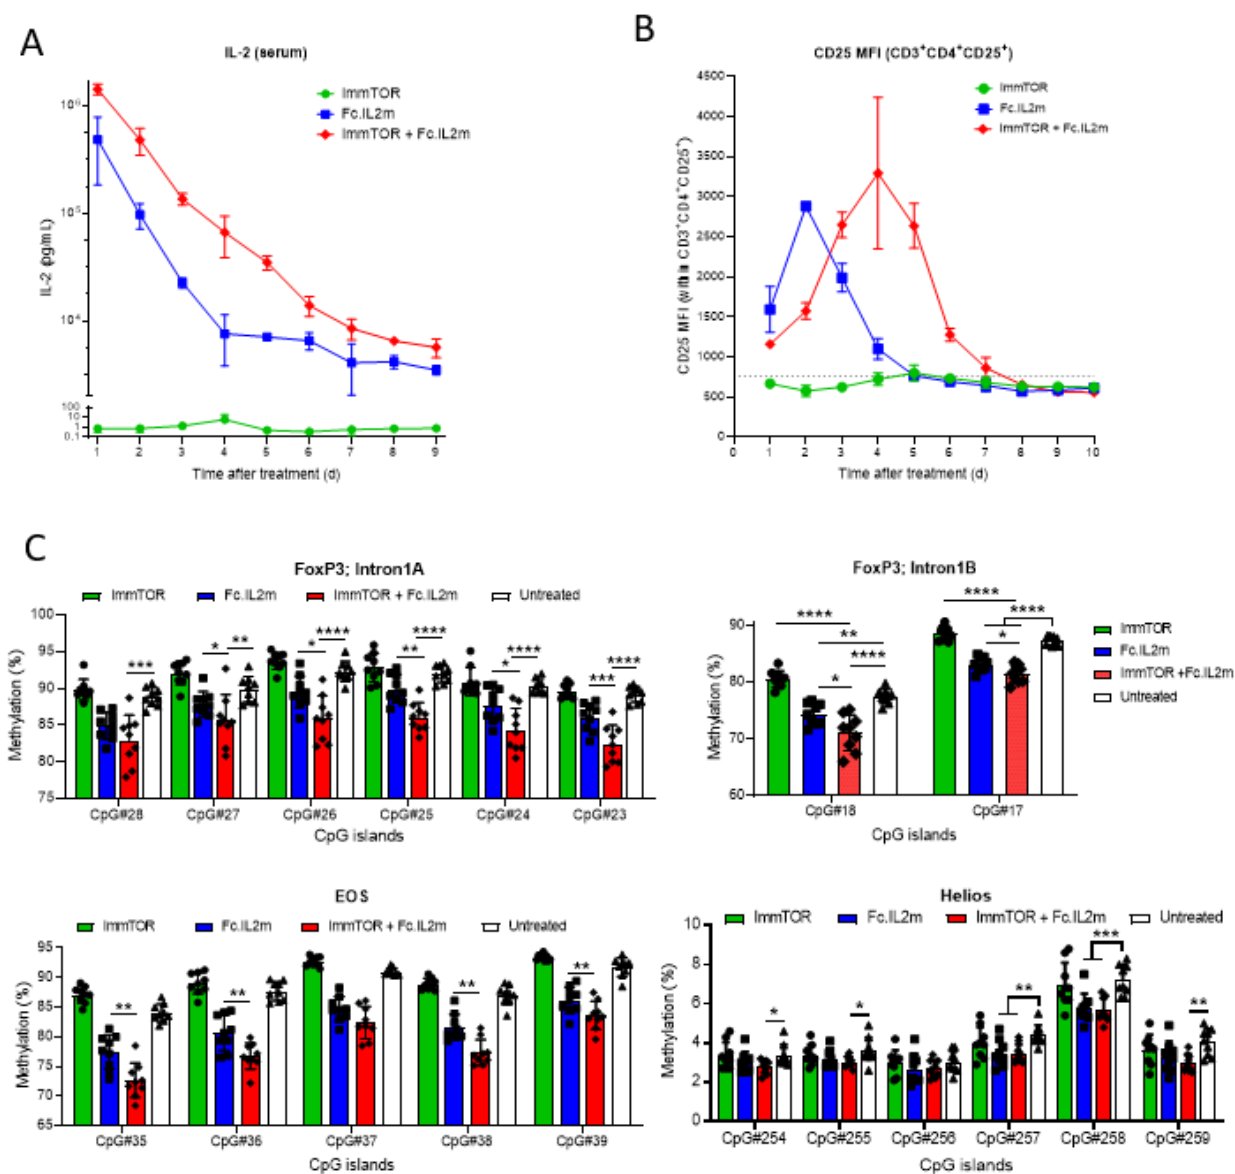

## Supplemental Figure 4

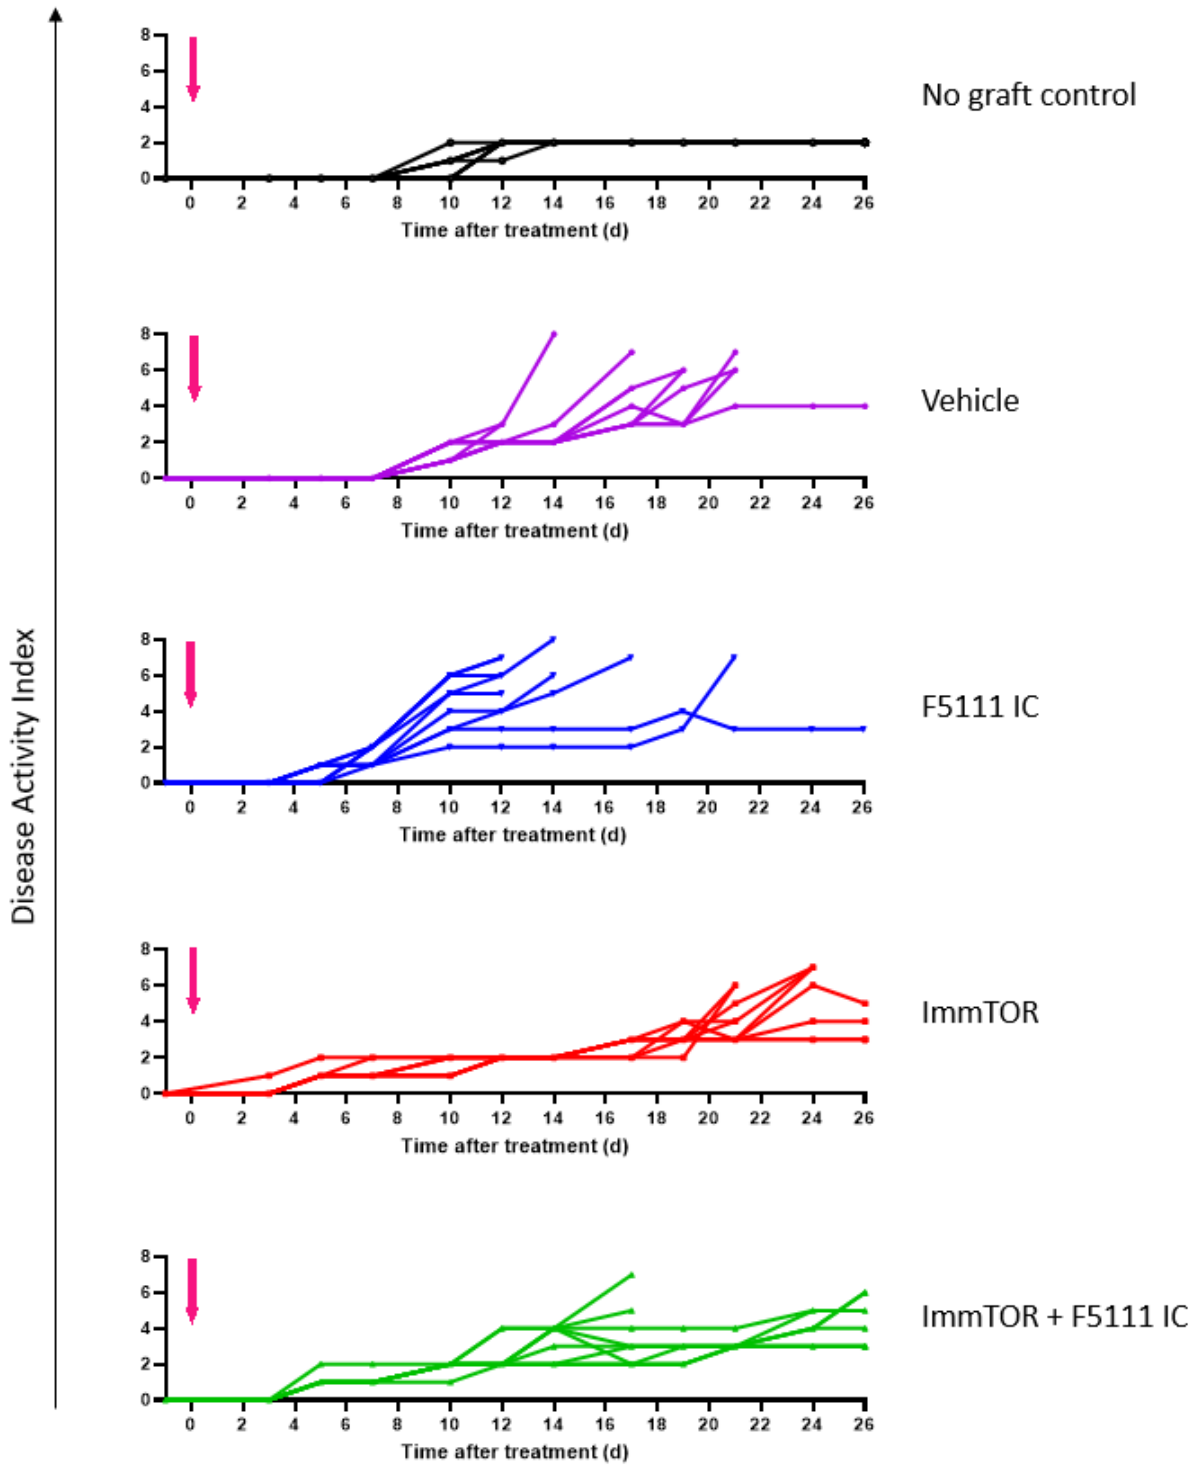



## Supplemental Figure 5

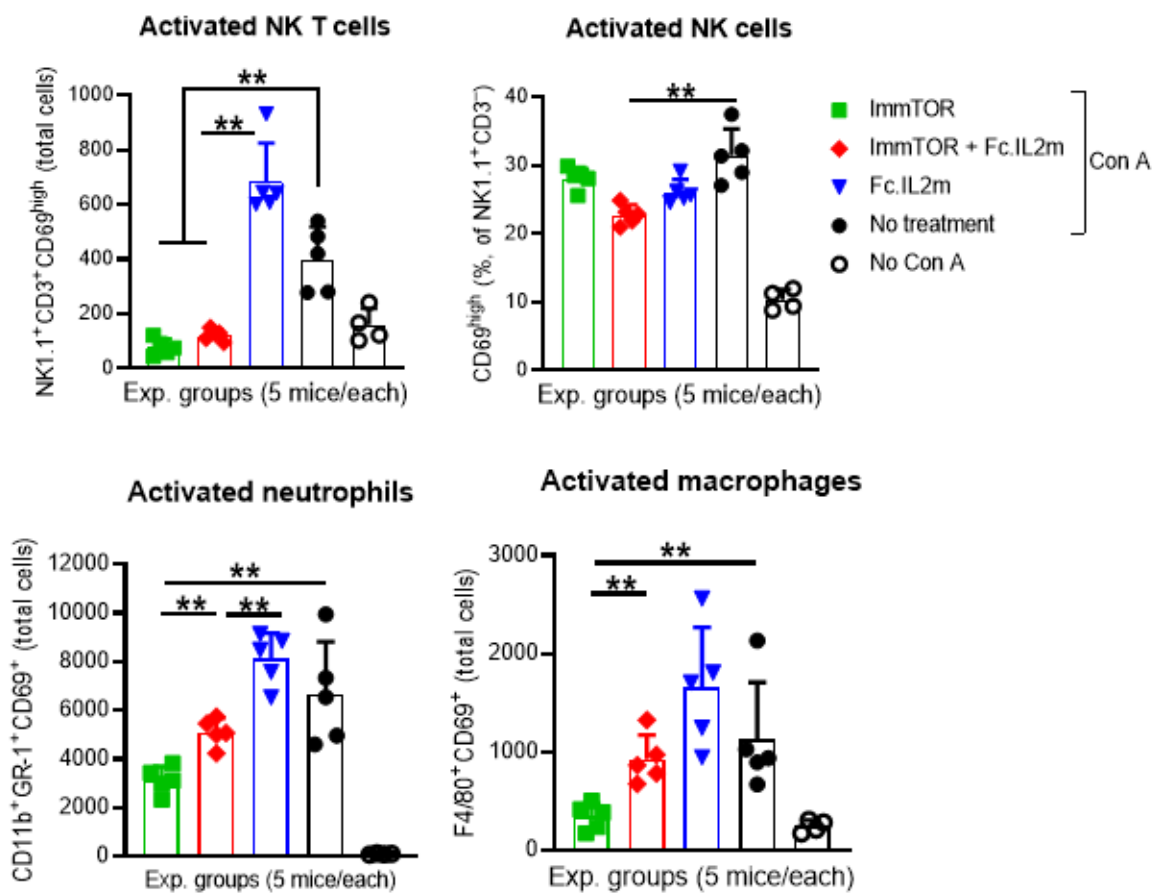

## Supplemental Figure 6

A

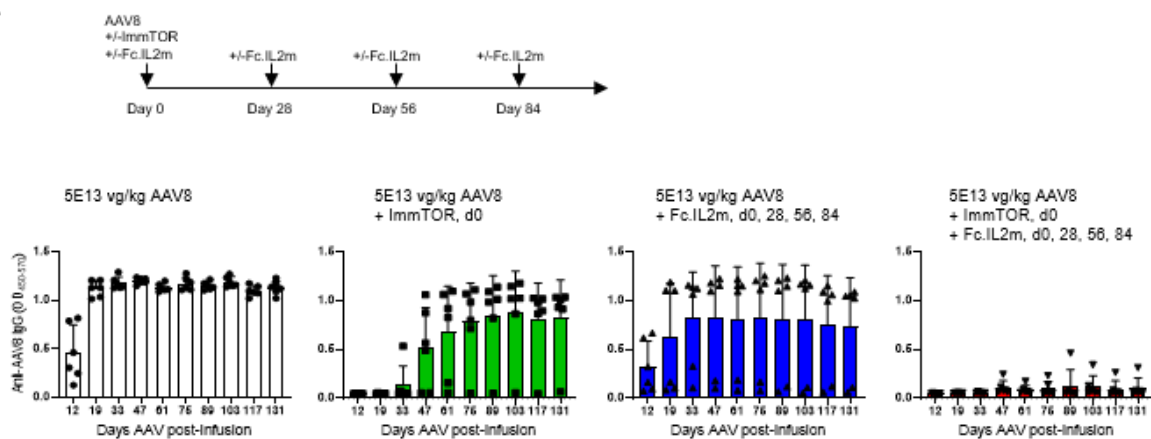

B

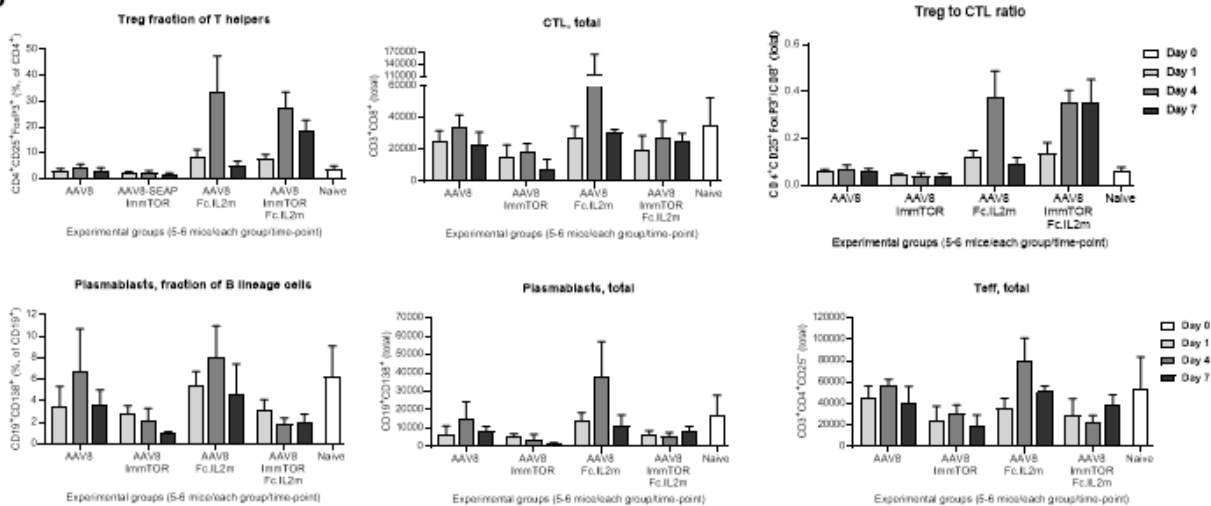

Source: https://www.biorxiv.org/content/10.1101/2023.05.15.540840v1.full.pdf
